# Supplementary material
Source: publisher site journal article supplement (https://www.dovepress.com/get_supplementary_file.php?f=255454.xlsx)
Supplement: Supplementary file 1 [file get_supplementary_file.php]

## Sheet: Table 1
Supplementary Table 1. Database search and results.
Keywords combination	Database	Number of articles since 1 January 2000
interaction AND person-cent* AND dementia	MEDLINE with full text	102
interaction AND relationship-cent* AND dementia	MEDLINE with full text	2
interaction AND person-cent* AND dementia	CINAHL Plus with full text	109
interaction AND relationship-cent* AND dementia	CINAHL Plus with full text	2
	total	215

## Sheet: Table 2
Supplementary Table 2. Title and abstract screen.
No.	Reference	Title	Abstract	Exclude/Include	Reason for exclusion
1	Abbott, K. M., Bettger, J. P., Hampton, K., & Kohler, H.-P. (2012). Exploring the use of social network analysis to measure social integration among older adults in assisted living. Family & Community Health, 35(4), 322-333.	Exploring the use of social network analysis to measure social integration among older adults in assisted living	Social integration is measured by a variety of social network indicators each with limitations in its ability to produce a complete picture of the variety and scope of interactions of older adults receiving long-term services and supports. The purpose of this study was to develop and evaluate the feasibility of collecting sociocentric (whole network) data among older adults in one assisted living…	include
2	Abbott, K. M., Sefcik, J. S., & Van Haitsma, K. (2017). Measuring social integration among residents in a dementia special care unit versus traditional nursing home: A pilot study. Dementia, 16(3), 388-403.	Measuring social integration among residents in a dementia special care unit versus traditional nursing home: A pilot study	The physical and mental health of older adults with dementia is affected by levels of social integration. The development of dementia special care units (D-SCU) arose, in part, to facilitate more meaningful social interactions among residents implying greater social integration of D-SCU residents as compared to residents in a traditional nursing home (TNH). But, it is unknown whether D-SCU reside…	include
3	Adams, T., & Gardiner, P. (2005). Communication and interaction within dementia care triads: developing a theory for relationship-centred care. Dementia, 4(2), 185-205.	Communication and interaction within dementia care triads: developing a theory for relationship-centred care	This article develops an approach towards dementia care that highlights the nature of dementia care triads comprising the person with dementia, their informal carer, and the health and social professional. In particular, the article highlights various social practices that are shown, from our practice, to contribute towards the inclusion or exclusion of particular triad members. The article revie…	exclude	review article
4	Allwood, R., Pilnick, A., O'Brien, R., Goldberg, S., Harwood, R. H., & Beeke, S. (2017). Should I stay or should I go? How healthcare professionals close encounters with people with dementia in the acute hospital setting. Social Science & Medicine, 191, 212-225.	Should I stay or should I go? How healthcare professionals close encounters with people with dementia in the acute hospital setting	Around a quarter of hospital beds in the UK are occupied by patients living with dementia (PWD), and communication impairments are common across all types of dementia, often exacerbated by the hospital environment. Unsurprisingly, healthcare professionals (HCPs) report particular challenges in caring for this patient group, whilst trying to recognise and value their personhood as per the underpin…	include
5	Alsawy, S., Tai, S., McEvoy, P., & Mansell, W. (2020). 'It's nice to think somebody's listening to me instead of saying "oh shut up"'. People with dementia reflect on what makes communication good and meaningful. Journal of Psychiatric & Mental Health Nursing, 27(2), 151-161	It's nice to think somebody's listening to me instead of saying "oh shut up"'. People with dementia reflect on what makes communication good and meaningful	Accessible summary: What is known on the subject?: People with dementia experience cognitive decline which can affect their ability to communicate with others and consequently getting their needs met.Loneliness and social isolation are associated with depression and anxiety, while difficulties communicating may magnify such difficulties. Enhancing meaningful interactions may support maintenance o…	include
6	Andersen, E. M., Kristiansen, E. D., & Rasmussen, G. (2019). Routines of "sitting" and "enjoying ourselves" in the common room of a dementia unit. Logopedics, phoniatrics, vocology, 44(1), 23-30.	Routines of "sitting" and "enjoying ourselves" in the common room of a dementia unit	Purpose: Routinized activities create security for persons with dementia (PWDs) and help care staff manage everyday tasks, but care staff also assist PWDs with constructing routines during their leisure time. This paper investigates how a PWD negotiates how to use the common room in a dementia ward as a social space with co-present staff members, other residents, and a visiting researcher.; Metho…	include
7	Baillie, L., Sills, E., & Thomas, N. (2016). Educating a health service workforce about dementia: a qualitative study. Quality in Ageing & Older Adults, 17(2), 119-130.	Educating a health service workforce about dementia: a qualitative study	Purpose – People who are living with dementia are core health service users, but there are ongoing concerns about the quality of their care and the need for improved education of healthcare staff. The purpose of this paper is to report a qualitative study that investigated staff perspectives on an ethnodrama (“Barbara’s Story”) which was used to educate an entire health service workforce and prom…	include
8	Ballard, C., Corbett, A., Ballard, C., & Corbett, A. (2010). Management of neuropsychiatric symptoms in people with dementia. CNS Drugs, 24(9), 729-739.	Management of neuropsychiatric symptoms in people with dementia	Neuropsychiatric symptoms are frequent and troublesome in people with dementia and present a major treatment challenge for clinicians. Most good practice guidelines suggest non-pharmacological treatments as the first-line therapy and there is emerging evidence, including randomized controlled trials, that a variety of psychological and training interventions, including social interaction and pers…	exclude	not reporting actual interaction between caregivers and care recipients with dementia
9	Ballard, C., Corbett, A., Orrell, M., Williams, G., Moniz-Cook, E., Romeo, R., Woods, B., Garrod, L., Testad, I., Woodward-Carlton, B., Wenborn, J., Knapp, M., & Fossey, J. (2018). Impact of person-centred care training and person-centred activities on quality of life, agitation, and antipsychotic use in people with dementia living in nursing homes: A cluster-randomised controlled trial. PLoS Med…	Impact of person-centred care training and person-centred activities on quality of life, agitation, and antipsychotic use in people with dementia living in nursing homes: A cluster-randomised controlled trial	Background: Agitation is a common, challenging symptom affecting large numbers of people with dementia and impacting on quality of life (QoL). There is an urgent need for evidence-based, cost-effective psychosocial interventions to improve these outcomes, particularly in the absence of safe, effective pharmacological therapies. This study aimed to evaluate the efficacy of a person-centred care an…	exclude	not reporting actual interaction between caregivers and care recipients with dementia
10	Ballard, C., Orrell, M., Sun, Y., Moniz-Cook, E., Stafford, J., Whitaker, R., Woods, B., Corbett, A., Banerjee, S., Testad, I., Garrod, L., Khan, Z., Woodward-Carlton, B., Wenborn, J., & Fossey, J. (2017). Impact of antipsychotic review and non-pharmacological intervention on health-related quality of life in people with dementia living in care homes: WHELD-a factorial cluster randomised controll…	Impact of antipsychotic review and non-pharmacological intervention on health-related quality of life in people with dementia living in care homes: WHELD-a factorial cluster randomised controlled trial	Background: Very few interventional studies have directly examined the impact of treatment approaches on health-related quality of life (HRQL) in people with dementia. This is of particular importance in therapies to address behavioural symptoms, where HRQL is often severely affected.; Methods: Analysis within the WHELD cluster randomised factorial study in 16 UK care homes examining the impact o…	exclude	not reporting actual interaction between caregivers and care recipients with dementia
11	Ballard, C., Orrell, M., YongZhong, S., Moniz-Cook, E., Stafford, J., Whittaker, R., Woods, B., Corbett, A., Garrod, L., Khan, Z., Woodward-Carlton, B., Wenborn, J., & Fossey, J. (2016). Impact of Antipsychotic Review and Nonpharmacological Intervention on Antipsychotic Use, Neuropsychiatric Symptoms, and Mortality in People With Dementia Living in Nursing Homes: A Factorial Cluster-Randomized Co…	Impact of Antipsychotic Review and Nonpharmacological Intervention on Antipsychotic Use, Neuropsychiatric Symptoms, and Mortality in People With Dementia Living in Nursing Homes: A Factorial Cluster-Randomized Controlled Trial by the Well-Being and Health for People With Dementia (WHELD) Program	Objective: This study evaluated the impact of antipsychotic review, social interaction, and exercise, in conjunction with person-centered care, on antipsychotic use, agitation, and depression in people with dementia living in nursing homes.Method: A cluster-randomized factorial controlled trial with two replications was conducted in people with dementia in 16 U.K. nursing homes. All homes receive…	exclude	not reporting actual interaction between caregivers and care recipients with dementia
12	Beerens, H. C., Zwakhalen, S. M. G., Verbeek, H., E S Tan, F., Jolani, S., Downs, M., de Boer, B., Ruwaard, D., & Hamers, J. P. H. (2018). The relation between mood, activity, and interaction in long-term dementia care. Aging & Mental health, 22(1), 26-32.	The relation between mood, activity, and interaction in long-term dementia care	Objective: The aim of the study is to identify the degree of association between mood, activity engagement, activity location, and social interaction during everyday life of people with dementia (PwD) living in long-term care facilities.; Method: An observational study using momentary assessments was conducted. For all 115 participants, 84 momentary assessments of mood, engagement in activity, lo…	exclude	not reporting actual interaction between caregivers and care recipients with dementia
13	Bennett, M., von Treuer, K., McCabe, M. P., Beattie, E., Karantzas, G., Mellor, D., Sanders, K., Busija, L., Goodenough, B., & Byers, J. (2020). Resident perceptions of opportunity for communication and contribution to care planning in residential aged care. International journal of older people nursing, 15(1), e12276.	Resident perceptions of opportunity for communication and contribution to care planning in residential aged care	Background and Aim: Irrespective of age, communication is a tool of expression and a key daily activity meeting the human need for social interaction and connection. The introduction of consumer-directed care (CDC) emphasises the importance of communication to provide consumers with the opportunity to exercise choice over the care they receive. As consumer-directed care progresses, it is hypothes…	exclude	not dealing with dementia
14	Bergland, Å., Johansen, H., & Sellevold, G. S. (2015). A qualitative study of professional caregivers' perceptions of processes contributing to mealtime agitation in persons with dementia in nursing home wards and strategies to attain calmness. Nursing open, 2(3), 119-129	A qualitative study of professional caregivers' perceptions of processes contributing to mealtime agitation in persons with dementia in nursing home wards and strategies to attain calmness	Aim: Describe professional caregivers' perceptions of factors and processes contributing to mealtime agitation and strategies for attaining and maintaining calm mealtimes.; Design: Qualitative and descriptive.; Methods: A convenience sample of professional caregivers working in two wards for residents with dementia was used. Data were collected during two focus-group interviews and supplemented w…	include
15	Boersma, P., van Weert, J. C. M., Lissenberg-Witte, B. I., van Meijel, B., & Dröes, R.-M. (2019). Testing the Implementation of the Veder Contact Method: A Theatre-Based Communication Method in Dementia Care. The Gerontologist, 59(4), 780-791.	Testing the Implementation of the Veder Contact Method: A Theatre-Based Communication Method in Dementia Care	Background and Objectives: There is a lack of research on implementation of person-centered care in nursing home care. The purpose of this study was to assess the implementation of the Veder contact method (VCM), a new person-centered method using theatrical, poetic and musical communication for application in 24-hr care.; Research Design and Methods: Caregivers (n = 136) and residents (n = 141) …	include
16	Boumans, J., van Boekel, L. C., Baan, C. A., & Luijkx, K. G. (2019). How Can Autonomy Be Maintained and Informal Care Improved for People With Dementia Living in Residential Care Facilities: A Systematic Literature Review. The Gerontologist, 59(6), e709-e730.	How Can Autonomy Be Maintained and Informal Care Improved for People With Dementia Living in Residential Care Facilities: A Systematic Literature Review	Background and Objectives: For people with dementia living in residential care facilities, maintaining autonomy and receiving informal care are important. The objective of this review is to understand how caregiving approaches and physical environment, including technologies contribute to the maintenance of autonomy and informal care provision for this population.; Research Design and Methods: A …	exclude	review article
17	Brataas, H. V., Bjugan, H., Wille, T., & Hellzen, O. (2010). Experiences of day care and collaboration among people with mild dementia. Journal of Clinical Nursing, 19(19-20), 2839-2848.	Experiences of day care and collaboration among people with mild dementia	Aims. The study was designed to assess how a day care programme once a week, for seven weeks, with group collaboration and social and cultural activities was experienced by clients. The aim was to provide some insight into how older adults with mild cognitive impairment perceive and experience day care. Background. As a consequence of social withdrawal, older adults with mild dementia may suffer …	include
18	Brossard Saxell, T., Ingvert, M., & Lethin, C. (2019). Facilitators for person-centred care of inpatients with dementia: A meta-synthesis of registered nurses' experiences. Dementia, 1471301219871408.	Facilitators for person-centred care of inpatients with dementia: A meta-synthesis of registered nurses' experiences	Person-centred care is widely advocated when caring for people with dementia. When a person with dementia is admitted for hospital care, hospital wards are obliged to not only address the cause for admission but also provide dementia-specific care during the hospital stay. Research has shown that the delivery of person-centred care to people with dementia is often inadequate or absent in the hosp…	exclude	review article
19	Buiza, C., García-Soler, Á., & Díaz-Veiga, P. (2019). Study of the wellbeing of people with dementia living in residential care settings with Person Centered Care. The use of a new instrument: List of Indicators of Wellbeing (LIBE). International Journal of Integrated Care, 19(S1), 1-2.	Study of the wellbeing of people with dementia living in residential care settings with Person Centered Care. The use of a new instrument: List of Indicators of Wellbeing (LIBE)	Introduction: In the context of Person-Centered-Care (PCC) in residential care settings, we developed and validated an observational instrument for assessing the wellbeing of the residents. From the PCC perspective, the instrument was designed to highlight the effects that physical and social environments have in the person and how is reflected on wellbeing. The objectives were to generate a numb…	Exclude	instrument development
20	Burack, O. R., Weiner, A. S., & Reinhardt, J. P. (2012). The Impact of Culture Change on Elders’ Behavioral Symptoms: A Longitudinal Study. Journal of the American Medical Directors Association, 13(6), 522-528.	The Impact of Culture Change on Elders’ Behavioral Symptoms: A Longitudinal Study	Abstract: Objectives: Distressing behavioral symptoms often associated with dementia are not uncommon in the long term care setting. Culture change with its “person-centered approach to care” provides a potential nonpharmacological intervention to reduce these symptoms. The purpose of this study was to examine the relationship between a culture change initiative and nursing home elders’ behaviora…	exclude	not reporting actual interaction between caregivers and care recipients with dementia
21	Casey, A.-N., Low, L.-F., Goodenough, B., Fletcher, J., & Brodaty, H. (2014). Computer-Assisted Direct Observation of Behavioral Agitation, Engagement, and Affect in Long-Term Care Residents. Journal of the American Medical Directors Association, 15(7), 514-520.	Computer-Assisted Direct Observation of Behavioral Agitation, Engagement, and Affect in Long-Term Care Residents	Abstract: Objectives: The objectives of the current research were (1) to test and evaluate the investigator-designed Behavior, Engagement, and Affect Measure (BEAM) touchpad direct observational data collection tool, and (2) to implement this tool to investigate residents' patterns of behavioral agitation, engagement, affect, behaviors associated with positive mood, general time-activity use, and…	exclude	not reporting actual interaction between caregivers and care recipients with dementia
22	Chaudhury, H., Hung, L., & Badger, M. (2013). The Role of Physical Environment in Supporting Person-centered Dining in Long-Term Care: A Review of the Literature. American Journal of Alzheimer's Disease & Other Dementias, 28(5), 491-500.	The Role of Physical Environment in Supporting Person-centered Dining in Long-Term Care: A Review of the Literature	The physical environment of dining rooms in long-term care facilities is increasingly recognized as an important catalyst in implementing a culture based on person-centered care philosophy. Mealtimes are important opportunities to support residents' personhood in care facilities. This article presents a critical review of the literature on evidence-based physical environmental interventions and e…	exclude	review article
23	Chenoweth, L., Forbes, I., Fleming, R., King, M. T., Stein-Parbury, J., Luscombe, G., Kenny, P., Jeon, Y.-H., Haas, M., & Brodaty, H. (2014). PerCEN: a cluster randomized controlled trial of person-centered residential care and environment for people with dementia. International Psychogeriatrics, 26(7), 1147-1160.	PerCEN: a cluster randomized controlled trial of person-centered residential care and environment for people with dementia	Background: There is good evidence of the positive effects of person-centered care (PCC) on agitation in dementia. We hypothesized that a person-centered environment (PCE) would achieve similar outcomes by focusing on positive environmental stimuli, and that there would be enhanced outcomes by combining PCC and PCE.Methods: 38 Australian residential aged care homes with scope for improvement in b…	exclude	not reporting actual interaction between caregivers and care recipients with dementia
24	Chenoweth, L., Jeon, Y.-H., Stein-Parbury, J., Forbes, I., Fleming, R., Cook, J., Cheah, S., Fletcher, S., & Tinslay, L. (2015). PerCEN trial participant perspectives on the implementation and outcomes of person-centered dementia care and environments. International Psychogeriatrics, 27(12), 2045-2057.	PerCEN trial participant perspectives on the implementation and outcomes of person-centered dementia care and environments	Background: Well-being and various forms of agitation in people with dementia can be improved in a person-centered long-term care setting. Data obtained during the Person-Centered Dementia Care and Environment (PerCEN) randomized controlled trial shed light on the factors that influenced the adoption and outcomes of person-centered interventions in long-term care from the perspective of study par…	exclude	not reporting actual interaction between caregivers and care recipients with dementia
25	Chiberska, D. (2018). The use of robotic animals in dementia care: challenges and ethical dilemmas. Mental Health Practice, 21(10), 23-28.	The use of robotic animals in dementia care: challenges and ethical dilemmas	This article looks at robotic pets and how they can be used in dementia care. The research discussed suggests that robot therapy could be beneficial to some people. The ethical dilemmas and challenges that need to be considered if planning the use of robotic pets is also discussed. Robot therapy can be used to enhance person-centred care rather than to replace human contact. Robotic pets can be u…	exclude	not reporting actual interaction between caregivers and care recipients with dementia
26	Choi, S., & Park, M. (2017). Student participation in a dementia-outreach research project as community-based experiential learning. Educational Gerontology, 43(4), 186-197.	Student participation in a dementia-outreach research project as community-based experiential learning	People with dementia (PWD) and their family caregivers need an increasing number of diverse health and social services. A multidisciplinary person-centered approach to dementia services is required to meet the complex needs of PWD and their family caregivers. However, educational programs struggle to prepare health and social work students to meet the complex needs of PWD and their family caregiv…	exclude	not reporting actual interaction between caregivers and care recipients with dementia
27	Clare, M. (2014). Soothing sounds: reducing agitation with music therapy. British Journal of Healthcare Assistants, 8(4), 190-195.	Soothing sounds: reducing agitation with music therapy	People with dementia may display agitated behaviours that staff may not understand. At St Peter's House, a person-centred approach is taken and behaviours are seen as a resident's attempt to communicate. Rather than take a pharmacological route-only used when all else has failed-the care home adopts a range of non-pharmacological methods and complementary therapies to provide stimulation and redu…	include
28	Coleman, C. K., Fanning, K., & Williams, K. N. (2015). Comparing Person-Centered Communication Education in Long-Term Care Using Onsite and Online Formats. Journal of gerontological nursing, 41(11), 22-28.	Comparing Person-Centered Communication Education in Long-Term Care Using Onsite and Online Formats	Educating nursing home (NH) staff to provide person-centered care is complicated by scheduling, costs, and other feasibility issues. The current study compared outcomes for an in-service program focused on person-centered communication provided in onsite and online formats. The Changing Talk program was provided onsite in seven NHs (n = 327 staff). The online program included eight NHs (n = 211 s…	exclude	not dealing with dementia
29	Cooney, A., Hunter, A., Murphy, K., Casey, D., Devane, D., Smyth, S., Dempsey, L., Murphy, E., Jordan, F., & O'Shea, E. (2014). 'Seeing me through my memories': a grounded theory study on using reminiscence with people with dementia living in long-term care. Journal of clinical nursing, 23(23-24), 3564-3574.	Seeing me through my memories': a grounded theory study on using reminiscence with people with dementia living in long-term care	Aims and Objectives: To understand people with dementia, staff and relatives perspectives on reminiscence, its impact on their lives and experience of care and care giving.; Background: The quality of life of people with dementia living in long-term care is an important question for providers and policymakers. Reminiscence is thought to have potential for increasing resident-staff interaction, th…	include
30	Cope, S. (2018). The power of collective action. Australian Journal of Dementia Care, 7(6), 28-30.	The power of collective action	The article explores ideas for practicing change in achieving a more collective person-centred approach from observations of interactions from a facility in the Pacific. It mentions that the mental health unit catered for people in acute mental health crisis as well as providing permanent residential care for dementia patients. It informs that people living with dementia in residential aged care …	include
31	Daly, L. (2017). Effective communication with older adults. Nursing Standard, 31(41), 55-63.	Effective communication with older adults	Communication is an essential aspect of life, yet it can be taken for granted. Its centrality to being in the world and in professional practice often becomes evident when nurses and older adults encounter communication difficulties. The factors that can affect nurses' communication with older adults relate to the older adult, the nurse, sociocultural considerations and the environment, and the i…	exclude	not dealing with dementia
32	Davis, B. H., & Pope, C. (2010). Institutionalized ghosting: policy contexts and language use in erasing the person with Alzheimer's. Language policy, 9(1), 29-44	Institutionalized ghosting: policy contexts and language use in erasing the person with Alzheimer's	The ordinary social engagement of human life would not usually be considered an arena for language policy. Yet clinical evidence mounts that social interaction improves our lives as we age. Since social engagement decreases cardiovascular risks (Ramsay et al. in Ann Epidemiol 18:476-483, 2008) and delays memory loss among those living in communities (Ertel et al. in Am J Public Health 98:1215-122…	exclude	not reporting actual interaction between caregivers and care recipients with dementia
33	de Boer, B., Beerens, H. C., Katterbach, M. A., Viduka, M., Willemse, B. M., & Verbeek, H. (2018). The Physical Environment of Nursing Homes for People with Dementia: Traditional Nursing Homes, Small-Scale Living Facilities, and Green Care Farms. Healthcare (Basel, Switzerland), 6(4).	The Physical Environment of Nursing Homes for People with Dementia: Traditional Nursing Homes, Small-Scale Living Facilities, and Green Care Farms	It is well recognized that the physical environment is important for the well-being of people with dementia. This influences developments within the nursing home care sector where there is an increasing interest in supporting person-centered care by using the physical environment. Innovations in nursing home design often focus on small-scale and homelike care environments. This study investigated…	include
34	de Boer, B., Hamers, J. P. H., Zwakhalen, S. M. G., Tan, F. E. S., Beerens, H. C., & Verbeek, H. (2017). Green Care Farms as Innovative Nursing Homes, Promoting Activities and Social Interaction for People With Dementia. Journal of the American Medical Directors Association, 18(1), 40-46.	Green Care Farms as Innovative Nursing Homes, Promoting Activities and Social Interaction for People With Dementia	Objectives Innovative care environments are developed for people with dementia to encourage person-centered care. This study aims to investigate whether residents of green care farms that provide 24-hour nursing care participate more in (physical) activities and social interaction compared with residents of other nursing homes. Design Longitudinal observation study. Setting Nursing homes in the N…	exclude	not reporting actual interaction between caregivers and care recipients with dementia
35	de Rooij, A. H. P. M., Luijkx, K. G., Spruytte, N., Emmerink, P. M. J., Schols, J. M. G. A., & Declercq, A. G. (2012). Family caregiver perspectives on social relations of elderly residents with dementia in small-scale versus traditional long-term care settings in the Netherlands and Belgium. Journal of Clinical Nursing, 21(21-22), 3106-3116.	Family caregiver perspectives on social relations of elderly residents with dementia in small-scale versus traditional long-term care settings in the Netherlands and Belgium	Aims and objectives. To provide insight into family caregiver perspectives on social relations within the 'caregiving triangle' between family caregiver, professional caregiver and elderly resident with dementia. Results were compared between traditional versus small-scale long-term care settings in the Netherlands and Belgium. Background. Residential dementia care is shifting towards a more holi…	include
36	de Wilde, C., Jones, J., & Fitzgerald, D. (2017). Alzheimer's Cafe Bray - An Integrated Hospital and Community Patient- Centred Approach. International Journal of Integrated Care, 17, 1-2.	Alzheimer's Cafe Bray - An Integrated Hospital and Community Patient- Centred Approach	Introduction: The idea of an Alzheimer's Cafe in North Wicklow developed when in the hospital we noted a lack of follow on support and education for people diagnosed with dementia and their carers. It was also noted that this was an increasing issue amongst our local population. Three Health and Social Care Professionals from St Columcille's Hospital attended training on Alzheimer's Cafe's in ord…	exclude	not reporting actual interaction between caregivers and care recipients with dementia
37	Dorey, A., Jordan, F., & Casey, D. (2019). Exploring the Utility of the VERA Framework to Improve Communication between Nursing Students and People with Dementia in Long-term Care...67th Annual & Scientific Meeting of the Irish Gerontological Society, Innovation, Advances and Excellence in Ageing, 26–28 September 2019, Cork, Ireland. Age & Ageing, 48, iii17-iii65.	Exploring the Utility of the VERA Framework to Improve Communication between Nursing Students and People with Dementia in Long-term Care.	Background Developed by Blackhall et al. (2011), the Validation, Emotion, Reassure, Activity (VERA) communication framework seeks to provide student nurses with a guide to provide person-centred care to people living with dementia. The framework aims to enable the caregiver to communicate with the person living with dementia in a respectful manner, and accept that there is both value and meaning …	exclude	not reporting actual interaction between caregivers and care recipients with dementia
38	Ericson‐Lidman, E., Larsson, L. l. F., & Norberg, A. (2014). Caring for people with dementia disease ( DD) and working in a private not-for-profit residential care facility for people with DD. Scandinavian Journal of Caring Sciences, 28(2), 337-346	Caring for people with dementia disease ( DD) and working in a private not-for-profit residential care facility for people with DD	Caring for people with dementia and working in dementia care is described as having both rewarding and unpleasant aspects and has been studied to a minor extent. This study aims to explore care providers' narrated experiences of caring for people with dementia disease ( DD) and working in a private not-for-profit residential care facility for people with DD. Nine care providers were interviewed a…	include
39	Ferdous, F., & Moore, K. D. (2015). Field Observations into the Environmental Soul: Spatial Configuration and Social Life for People Experiencing Dementia. American Journal of Alzheimer's Disease & Other Dementias, 30(2), 209-218	Field Observations into the Environmental Soul: Spatial Configuration and Social Life for People Experiencing Dementia	This article focuses on the important, facilitating role architectural design plays in social interaction within long-term care facilities (LTCFs) serving people with dementia. Here, we apply space syntax, a set of theories and techniques for the analysis of spatial configurations, as an objective measure of environmental characteristics. Almost 150 rounds of behavioral observations were collecte…	include
40	Forbat, L., & Service, K. P. (2005). Who cares? Contextual layers in end-of-life care for people with intellectual disability and dementia. Dementia, 4(3), 413-431.	Who cares? Contextual layers in end-of-life care for people with intellectual disability and dementia	The complexity of the relationship between intellectual disability (ID) and dementia is increasingly acknowledged. In order to operationalize a route towards person-centred care, we introduce the hierarchy model (Pearce, 1999) as a tool to focus the attention of policy and practice on all aspects of caregiving. This tool, which is taken from the family therapy literature, enables practitioners to…	exclude	not reporting actual interaction between caregivers and care recipients with dementia
41	Garlinghouse, A., Rud, S., Johnson, K., Plocher, T., Klassen, D., Havey, T., & Gaugler, J. E. (2018). Creating objects with 3D printers to stimulate reminiscence in memory loss: A mixed-method feasibility study. Informatics for Health & Social Care, 43(4), 362-378.	Creating objects with 3D printers to stimulate reminiscence in memory loss: A mixed-method feasibility study	Objective: The objective of the current project was to determine the feasibility of using 3D printed technology to facilitate reminiscence-related activities for persons with memory loss (PWMLs).Methods: A parallel convergent mixed methods design was used. Fifteen PWMLs, 13 family members, and six staff from two residential long-term care facilities participated. Participants were observed and in…	exclude	not dealing with dementia
42	Gaugler, J. E., Hobday, J. V., & Savik, K. (2013). The CARES® Observational Tool: A valid and reliable instrument to assess person-centered dementia care. Geriatric Nursing, 34(3), 194-198.	The CARES® Observational Tool: A valid and reliable instrument to assess person-centered dementia care	The goal of the current study was to develop a valid and reliable tool to measure whether person- centered care is delivered by direct care workers to persons with dementia. Face validity was initially established through multiple revisions of the CARES® Observational Tool (COT™) by members of the study team. Afterward, content validity of the COT was established by piloting the tool on 31 observ…	exclude	not reporting actual interaction between caregivers and care recipients with dementia
43	Gilmore-Bykovskyi, A. L. (2015). Caregiver person-centeredness and behavioral symptoms during mealtime interactions: Development and feasibility of a coding scheme. Geriatric Nursing, S10-S15.	Caregiver person-centeredness and behavioral symptoms during mealtime interactions: Development and feasibility of a coding scheme	Mealtime behavioral symptoms are distressing and frequently interrupt eating for the individual experiencing them and others in the environment. A computer-assisted coding scheme was developed to measure caregiver person-centeredness and behavioral symptoms for nursing home residents with dementia during mealtime interactions. The purpose of this pilot study was to determine the feasibility, ease…	include
44	Gilmore-Bykovskyi, A. L., & Rogus-Pulia, N. (2018). TEMPORAL ASSOCIATIONS BETWEEN CAREGIVING APPROACH, BEHAVIORAL SYMPTOMS AND OBSERVABLE INDICATORS OF ASPIRATION IN NURSING HOME RESIDENTS WITH DEMENTIA. Journal of Nutrition, Health & Aging, 22(3), 400-406.	TEMPORAL ASSOCIATIONS BETWEEN CAREGIVING APPROACH, BEHAVIORAL SYMPTOMS AND OBSERVABLE INDICATORS OF ASPIRATION IN NURSING HOME RESIDENTS WITH DEMENTIA	Objectives: Dysphagia, or impaired swallowing, is common in nursing home (NH) residents with dementia and contributes to malnutrition and diminished quality of life. Dysphagia also commonly leads to aspiration or passage of food or fluids into the airway, which can result in aspiration pneumonia--a leading cause of death for people with dementia. Currently available interventions for dysphagia ai…	exclude	not reporting actual interaction between caregivers and care recipients with dementia
45	Gilson, A., Dodds, D., Kaur, A., Potteiger, M., & Ford Ii, J. H. (2019). Using Computer Tablets to Improve Moods for Older Adults With Dementia and Interactions With Their Caregivers: Pilot Intervention Study. JMIR formative research, 3(3), e14530.	Using Computer Tablets to Improve Moods for Older Adults With Dementia and Interactions With Their Caregivers: Pilot Intervention Study	Background: Persons living with dementia represent a significant and growing segment of the older adult (aged 65 years and older) population. They are often challenged expressively and may experience difficulties with sharing their feelings or moods. Availability of, and easy access to, tablets facilitates the use of information and communication technologies (ICTs) as a delivery mechanism for no…	include
46	Godfrey, M., Young, J., Shannon, R., Skingley, A., Woolley, R., Arrojo, F., Brooker, D., Manley, K., & Surr, C. (2018). The Person, Interactions and Environment Programme to improve care of people with dementia in hospital: a multisite study. Health Services and Delivery Research.	The Person, Interactions and Environment Programme to improve care of people with dementia in hospital: a multisite study	Background: Improving the care of people with dementia on acute hospital wards is a policy priority. Person-centred care is a marker of care quality; delivering such care is a goal of service improvement.; Objectives: The Person, Interactions and Environment (PIE) Programme comprises an observation tool and a systematic approach to implement and embed a person-centred approach in routine care for…	exclude	not reporting actual interaction between caregivers and care recipients with dementia
47	Goeman, D., Comans, T., Enticott, J. C., Renehan, E., Beattie, E., Kurrle, S., & Koch, S. (2016). Evaluating the Efficacy of the "Support for Life" Program for People with Dementia and Their Families and Carers' to Enable Them to Live Well: A Protocol for a Cluster Stepped Wedge Randomized Controlled Trial. Frontiers in public health, 4, 245.	Evaluating the Efficacy of the "Support for Life" Program for People with Dementia and Their Families and Carers' to Enable Them to Live Well: A Protocol for a Cluster Stepped Wedge Randomized Controlled Trial	Introduction: Assistance provided to support people living with dementia and carers is highly valued by them. However, current support systems in Australia are disjointed, inaccessible to all, poorly coordinated, and focus on dysfunction rather than ability. Support workers for people with dementia are in short supply, and there is little consistency in their roles. To address this large service …	exclude	not reporting actual interaction between caregivers and care recipients with dementia
48	Goldberg, S. E., Bradshaw, L. E., Kearney, F. C., Russell, C., Whittamore, K. H., Foster, P. E. R., Mamza, J., Gladman, J. R. F., Jones, R. G., Lewis, S. A., Porock, D., & Harwood, R. H. (2013). Care in specialist medical and mental health unit compared with standard care for older people with cognitive impairment admitted to general hospital: randomised controlled trial (NIHR TEAM trial). BMJ (C…	Care in specialist medical and mental health unit compared with standard care for older people with cognitive impairment admitted to general hospital: randomised controlled trial (NIHR TEAM trial)	Objective: To develop and evaluate a best practice model of general hospital acute medical care for older people with cognitive impairment.; Design: Randomised controlled trial, adapted to take account of constraints imposed by a busy acute medical admission system.; Setting: Large acute general hospital in the United Kingdom.; Participants: 600 patients aged over 65 admitted for acute medical ca…	exclude	not addressing person-centered care or relationship-centered care
49	Graneheim, U. H., Jansson, L., & Lindgren, B.-M. (2015). Hovering between Heaven and Hell: An Observational Study Focusing on the Interactions between One Woman with Schizophrenia, Dementia, and Challenging Behaviour and her Care Providers. Issues in Mental Health Nursing, 36(7), 543-550.	Hovering between Heaven and Hell: An Observational Study Focusing on the Interactions between One Woman with Schizophrenia, Dementia, and Challenging Behaviour and her Care Providers	This case study aims to illuminate the interactions between one woman (Alice) with schizophrenia, dementia, and challenging behaviour and her professional caregivers. We performed participant observations of these interactions and conducted informal interviews at the residential home where the woman lived. The transcripts were subjected to qualitative content analysis. The results showed that the…	include
50	Griffin, J. M., Riffin, C., Havyer, R. D., Biggar, V. S., Comer, M., Frangiosa, T. L., & Bangerter, L. R. (2019). Integrating Family Caregivers of People With Alzheimer's Disease and Dementias into Clinical Appointments: Identifying Potential Best Practices. Journal of applied gerontology,	Integrating Family Caregivers of People With Alzheimer's Disease and Dementias into Clinical Appointments: Identifying Potential Best Practices	Family caregiver engagement in clinical encounters can promote relationship-centered care and optimize outcomes for people with Alzheimer's disease and related dementias (ADRD). Little is known, however, about effective ways for health care providers to engage family caregivers in clinical appointments to provide the highest quality care. We describe what caregivers of people with ADRD and people…	include
51	Gwernan-Jones, R., Abbott, R., Lourida, I., Rogers, M., Green, C., Ball, S., Hemsley, A., Cheeseman, D., Clare, L., Moore, D. A., Hussey, C., Coxon, G., Llewellyn, D. J., Naldrett, T., & Thompson Coon, J. (2020). The experiences of hospital staff who provide care for people living with dementia: A systematic review and synthesis of qualitative studies. International journal of older people nursin…	The experiences of hospital staff who provide care for people living with dementia: A systematic review and synthesis of qualitative studies	Aims and Objectives: To systematically review and synthesise qualitative data from studies exploring the experiences of hospital staff who care for people living with dementia (Plwd).; Background: In hospital, the number of Plwd continues to rise; however, their experiences of care remain problematic. Negative experiences of care are likely to contribute to poorer mental and physical health outco…	exclude	review article
52	Haapala, I., Biggs, S., & Kurrle, S. (2018). Social aspects of dementia and dementia practice. International Psychogeriatrics, 30(11), 1579-1581.	Social aspects of dementia and dementia practice	Social aspects of dementia are becoming increasingly important as part of a wider shift in emphasis from cure to care. This is partly because approaches based on finding a cure have proved far more difficult and complex than originally imagined (WHO, 2016). New evidence on the effectiveness of public health measures, that while incidence is growing as the proportion of older people in society inc…	exclude	not reporting actual interaction between caregivers and care recipients with dementia
53	Häikiö, K., Sagbakken, M., & Rugkåsa, J. (2019). Dementia and patient safety in the community: a qualitative study of family carers' protective practices and implications for services. BMC Health Services Research, 19(1),	Dementia and patient safety in the community: a qualitative study of family carers' protective practices and implications for services	Background: Dementia is a cause of disability and dependency associated with high demands for health services and expected to have a significant impact on resources. Care policies worldwide increasingly rely on family caregivers to contribute to service delivery for older people, and the general direction of health care policy internationally is to provide care in the community, meaning most peop…	exclude	not addressing person-centered care or relationship-centered care
54	Hamiduzzaman, M., Kuot, A., Greenhill, J., Strivens, E., & Isaac, V. (2020). Towards personalized care: Factors associated with the quality of life of residents with dementia in Australian rural aged care homes. PloS one, 15(5), e0233450.	Towards personalized care: Factors associated with the quality of life of residents with dementia in Australian rural aged care homes	Quality of dementia care improves with a personalized approach to aged care, and knowledge of the disease process and unique care needs of residents with dementia. A personalized model of care can have a significant impact on the overall organizational culture in aged care homes. However, the dimensions of personalized aged care relating to dementia often remain under-managed. We aim to explore t…	exclude	not reporting actual interaction between caregivers and care recipients with dementia
55	Handley, M., Bunn, F., & Goodman, C. (2019). Supporting general hospital staff to provide dementia sensitive care: A realist evaluation. International Journal of Nursing Studies, 96, 61-71.	Supporting general hospital staff to provide dementia sensitive care: A realist evaluation	There are an increasing number of interventions to improve hospital care for patients with dementia. Evidence for their impact on staff actions and patient outcomes is, however, limited and context dependent. To explain the factors that support hospital staff to provide dementia sensitive care and with what outcomes for patients with dementia. A realist evaluation using a two-site case study appr…	include
56	Harwood, R. H., O’Brien, R., Goldberg, S. E., Allwood, R., Pilnick, A., Beeke, S., Thomson, L., Murray, M., Parry, R., Kearney, F., Baxendale, B., Sartain, K., & Schneider, J. (2018). A staff training intervention to improve communication between people living with dementia and health-care professionals in hospital: the VOICE mixed-methods development and evaluation study. Health Services and Del…	A staff training intervention to improve communication between people living with dementia and health-care professionals in hospital: the VOICE mixed-methods development and evaluation study	Background: Twenty-five per cent of hospital beds are occupied by a person living with dementia. Dementia affects expressive communication and understanding. Health-care professionals report a lack of communication skills training.; Objectives: To identify teachable, effective strategies for communication between health-care professionals and people living with dementia, and to develop and evalua…	Exclude	non-journal publication
57	Hawkes, T., Luff, T., & Gee, S. B. (2019). Supporting Person-Centred Dementia Care for People with Intellectual Disabilities Using the Person, Interaction, Environment Programme. New Zealand Journal of Occupational Therapy, 66(1), 12-18.	Supporting Person-Centred Dementia Care for People with Intellectual Disabilities Using the Person, Interaction, Environment Programme	This small scale study explored person-centred care for people with a dual diagnosis of intellectual disability and dementia. The goal was to identify areas of improvement in relation to personalised care, interactions with staff, and the environment. The Person, Interaction, Environment programme was used in staff training. Data was gathered using a cyclical process of observation, feedback and …	include
58	Heap, C. J., & Wolverson, E. (2018). Intensive Interaction and discourses of personhood: A focus group study with dementia caregivers. Dementia, 1471301218814389.	Intensive Interaction and discourses of personhood: A focus group study with dementia caregivers	Introduction: Societal discourses of dementia are medicalised and dehumanising. This leads to a social problem: the loss of personhood in dementia care. The communication technique Intensive Interaction, however, honours personhood. The current study aimed to explore how paid caregivers of people with dementia enact societal discourses of dementia, with and without the context of Intensive Intera…	include
59	Hennelly, N., Cooney, A., Houghton, C., & O'Shea, E. (2019). Personhood and Dementia Care: A Qualitative Evidence Synthesis of the Perspectives of People With Dementia. The Gerontologist.	Personhood and Dementia Care: A Qualitative Evidence Synthesis of the Perspectives of People With Dementia	Background and Objectives: Personhood is considered the cornerstone of person-centered care for people with dementia. However, there is little research on personhood in dementia care from the perspective of the person with dementia themselves. This article presents a qualitative evidence synthesis of the experiences and perceptions of people with dementia on personhood in dementia care.; Research…	exclude	review article
60	Hughes, J. C. (2013). Philosophical issues in dementia. Current Opinion in Psychiatry, 26(3), 283-288.	Philosophical issues in dementia	PURPOSE OF REVIEW: This review aims to consider the philosophical literature from the last 18 months relevant to dementia. Philosophical thought should underpin and strengthen developments in clinical practice. For instance, deepening our thoughts about personhood should support the development of person-centred care. RECENT FINDINGS: There is relatively little work written by philosophers about …	exclude	not reporting actual interaction between caregivers and care recipients with dementia
61	Hung, L., Au-Yeung, A., Helmer, C., Ip, A., Elijah, L., Wilkins-Ho, M., & Chaudhury, H. (2018). Feasibility and acceptability of an iPad intervention to support dementia care in the hospital setting. Contemporary Nurse: A Journal for the Australian Nursing Profession, 54(4/5), 350-361.	Feasibility and acceptability of an iPad intervention to support dementia care in the hospital setting	Background: Staying in the hospital can be a very stressful experience for older people with dementia. A familiar face and reassuring voice of a family member or friend can offer a sense of safety and comfort. Aims: To explore the feasibility and acceptability of using an iPad Simulated Presence Therapy intervention with hospitalized older people with dementia. Design: We used a mixed-method desi…	include
62	Hung, L., Phinney, A., Chaudhury, H., Rodney, P., Tabamo, J., & Bohl, D. (2017). 'Little things matter!' Exploring the perspectives of patients with dementia about the hospital environment. International Journal of Older People Nursing, 12(3)	Little things matter!' Exploring the perspectives of patients with dementia about the hospital environment	Background Recognising demographic changes and importance of the environment in influencing the care experience of patients with dementia, there is a need for developing the knowledge base to improve hospital environments. Involving patients in the development of the hospital environment can be a way to create more responsive services. To date, few studies have involved the direct voice of patien…	exclude	not reporting actual interaction between caregivers and care recipients with dementia
63	Jaycock, S., Persaud, M., & Johnson, R. (2006). The effectiveness of dementia care mapping in intellectual disability residential services: a follow-up study. Journal of intellectual disabilities, 10(4), 365-375.	The effectiveness of dementia care mapping in intellectual disability residential services: a follow-up study	This article is presented as a follow-up to exploratory work published in this journal in 2001. It describes a study that aimed to assess the effectiveness of dementia care mapping in supporting practice improvement in intellectual disability residential services. An average of 9 hours of observational data was collected using dementia care mapping in relation to 14 adults with severe or profound…	include
64	Jeon, Y.-H., Luscombe, G., Chenoweth, L., Stein-Parbury, J., Brodaty, H., King, M., & Haas, M. (2012). Staff outcomes from the Caring for Aged Dementia Care REsident Study (CADRES): A cluster randomised trial. International Journal of Nursing Studies, 49(5), 508-518.	Staff outcomes from the Caring for Aged Dementia Care REsident Study (CADRES): A cluster randomised trial	Abstract: Background: Dementia care mapping and person centred care are well-accepted as processes for improving care and well-being for persons with dementia living in the residential setting. However, the impact of dementia care mapping and person centred care on staff has not been well researched. Objectives: The impact of person centred care and dementia care mapping compared to each other an…	include
65	Juster, R.-P., Bizik, G., Picard, M., Arsenault-Lapierre, G., Sindi, S., Trepanier, L., Marin, M.-F., Wan, N., Sekerovic, Z., Lord, C., Fiocco, A. J., Plusquellec, P., McEwen, B. S., & Lupien, S. J. (2011). A transdisciplinary perspective of chronic stress in relation to psychopathology throughout life span development. Development and psychopathology, 23(3), 725-776.	A transdisciplinary perspective of chronic stress in relation to psychopathology throughout life span development	The allostatic load (AL) model represents an interdisciplinary approach to comprehensively conceptualize and quantify chronic stress in relation to pathologies throughout the life cycle. This article first reviews the AL model, followed by interactions among early adversity, genetics, environmental toxins, as well as distinctions among sex, gender, and sex hormones as integral antecedents of AL. …	exclude	not addressing person-centered care or relationship-centered care
66	Keller, H. H., Carrier, N., Slaughter, S. E., Lengyel, C., Steele, C. M., Duizer, L., Morrison, J., Brown, K. S., Chaudhury, H., Yoon, M. N., Duncan, A. M., Boscart, V., Heckman, G., & Villalon, L. (2017). Prevalence and Determinants of Poor Food Intake of Residents Living in Long-Term Care. Journal of the American Medical Directors Association, 18(11), 941-947.	Prevalence and Determinants of Poor Food Intake of Residents Living in Long-Term Care	Objective Poor food intake is known to lead to malnutrition in long-term care homes (LTCH), yet multilevel determinants of food intake are not fully understood, hampering development of interventions that can maintain the nutritional status of residents. This study measures energy and protein intake of LTCH residents, describes prevalence of diverse covariates, and the association of covariates w…	exclude	not addressing person-centered care or relationship-centered care
67	Kelley, R., Godfrey, M., & Young, J. (2019). The impacts of family involvement on general hospital care experiences for people living with dementia: An ethnographic study. International Journal of Nursing Studies, 96, 72-81.	The impacts of family involvement on general hospital care experiences for people living with dementia: An ethnographic study	A quarter of people in general hospitals have dementia. Limited existing studies suggest that hospital care experiences of people living with dementia, and the involvement of their families in care, may be suboptimal. The objectives of this study were to explore how family involvement impacts upon experiences of hospital care for people living with dementia. A qualitative ethnographic study. Ethn…	include
68	Kolanowski, A., Behrens, L., Lehman, E., Oravecz, Z., Resnick, B., Boltz, M., Van Haitsma, K., Galik, E., Ellis, J., & Eshraghi, K. (2020). Living Well With Dementia: Factors Associated With Nursing Home Residents' Affect Balance. Research in Gerontological Nursing, 13(1), 21-30.	Living Well With Dementia: Factors Associated With Nursing Home Residents' Affect Balance	Well-being is an important outcome for people with dementia. The current study is a secondary analysis of baseline data from an ongoing pragmatic trial. Affect balance, the ratio of positive to negative affect, was used as a measure of well-being, and factors related to it were examined in a sample of 325 nursing home residents. Measures of staff interaction during caregiving, staff knowledge of …	include
69	Kontos, P. C. (2012). Rethinking sociability in long-term care: An embodied dimension of selfhood. Dementia, 11(3), 329-346.	Rethinking sociability in long-term care: An embodied dimension of selfhood	Sociability, interaction through which solitariness becomes togetherness or a union with others, has largely been explored without reference to the importance of bodily sources of agency. Encapsulated in the theoretical notion of embodied selfhood is the pre-reflective nature of selfhood deriving from the body's pre-reflective capacity for engaging with the world and the socio-cultural significan…	exclude	not reporting actual interaction between caregivers and care recipients with dementia
70	Kontos, P., Miller, K.-L., Mitchell, G. J., & Stirling-Twist, J. (2017). Presence redefined: The reciprocal nature of engagement between elder-clowns and persons with dementia. Dementia, 16(1), 46-66.	Presence redefined: The reciprocal nature of engagement between elder-clowns and persons with dementia	Elder-clowns are a recent innovation in arts-based approaches to person-centred dementia care. They use improvisation, humour, and empathy, as well as song, dance, and music. We examined elder-clown practice and techniques through a 12-week programme with 23 long-term care residents with moderate to severe dementia in Ontario, Canada. Analysis was based on qualitative interviews and ethnographic …	exclude	not reporting actual interaction between caregivers and care recipients with dementia
71	Koo, B. M., & Vizer, L. M. (2019). Examining Mobile Technologies to Support Older Adults With Dementia Through the Lens of Personhood and Human Needs: Scoping Review. JMIR mHealth and uHealth, 7(11), e15122.	Examining Mobile Technologies to Support Older Adults With Dementia Through the Lens of Personhood and Human Needs: Scoping Review	Background: With the world's rapidly growing older adult population, there is an increase in the number of people living with dementia. This growth leads to a strain on their caregivers and our health care system and to an increased attention on mitigating strain by using mobile technology to sustain the independence of people with dementia. However, less attention is given to whether these techn…	exclude	review article
72	Lann-Wolcott, H., Medvene, L. J., & Williams, K. (2011). Measuring the person-centeredness of caregivers working with nursing home residents with dementia. Behavior therapy, 42(1), 89-99.	Measuring the person-centeredness of caregivers working with nursing home residents with dementia	There is increasing interest in promoting person-centered caregiving within gerontology. However, few observational instruments have been developed to measure person-centered caregiving behaviors. In the present study, two innovative coding instruments-the Person-Centered Behavior Inventory (PCBI) and the Global Behavior Scale (GBS)-were used to test the hypothesis that caregivers' person-centere…	exclude	not reporting actual interaction between caregivers and care recipients with dementia
73	Levy-Storms, L., Harris, L. M., & Chen, X. (2016). A Video-Based Intervention on and Evaluation of Nursing Aides' Therapeutic Communication and Residents' Agitation During Mealtime in a Dementia Care Unit. Journal of nutrition in gerontology and geriatrics, 35(4), 267-281.	A Video-Based Intervention on and Evaluation of Nursing Aides' Therapeutic Communication and Residents' Agitation During Mealtime in a Dementia Care Unit	The researchers conducted a communication training intervention for certified nursing assistants (CNAs). The intervention aimed at improving CNAs' therapeutic techniques for relating to agitated residents during care. This study focused on an in-depth evaluation of mealtime interactions using videos. Sixteen CNAs and 16 residents living with dementia from one long-term care facility were videotap…	exclude	not addressing person-centered care or relationship-centered care
74	Lykkeslet, E., Gjengedal, E., Skrondal, T., & Storjord, M.-B. (2014). Sensory stimulation - a way of creating mutual relations in dementia care. International journal of qualitative studies on health and well-being, 9, 23888.	Sensory stimulation - a way of creating mutual relations in dementia care	The overall aim of this 2-year Norwegian action research study was to improve the interaction between care workers and patients with dementia in a nursing home by means of sensory stimulation. Furthermore, the aim was to investigate how the staff experienced the interaction with patients suffering from behavioral and psychological symptoms of dementia before, under, and after introduction of sens…	include
75	Machiels, M., Zwakhalen, S. M. G., Metzelthin, S. F., & Hamers, J. P. H. (2017). Towards better communication in nursing homes between nurses and people with dementia: design of a communication intervention. BMC Nursing, 16, 6-6.	Towards better communication in nursing homes between nurses and people with dementia: design of a communication intervention	Background Although nurses often report communication difficulties in caring for people with dementia (PWD), evidence-based interventions to improve communication during daily nursing care are scarce [1]. Therefore, we developed a theory-informed intervention with the aim to improve communication between nurses and PWD. Materials and methods Development was done using the Behaviour Change Wheel […	exclude	not reporting actual interaction between caregivers and care recipients with dementia
76	May, A. A., Dada, S., & Murray, J. (2019). Review of AAC interventions in persons with dementia. International Journal of Language & Communication Disorders, 54(6), 857-874.	Review of AAC interventions in persons with dementia	Background: Communication is an important priority in dementia research. Communication strategies and scaffolds, specifically through augmentative and alternative communication (AAC), offer vital compensatory support for persons with dementia in an attempt to maintain the latter's quality of life and well‐being through participation with others. To date, no research review has been published that…	exclude	review article
77	Mekki, T. E., Hallberg, I. R., & ye, C. (2018). Lessons learned from mixed-methods research when designing and evaluating an education intervention in nursing homes: a retrospective reflection. International Practice Development Journal, 8(2), 1-13.	Lessons learned from mixed-methods research when designing and evaluating an education intervention in nursing homes: a retrospective reflection	Background: Several interacting factors, such as the evidence, modes of delivery, and care recipients and their contexts influence the success or failure of implementation and practice development in health services. Mixed-methods research has the potential to unpack these elements and clarify their effect. However, mixed-methods approaches embedded in different worldviews may challenge both the …	exclude	not reporting actual interaction between caregivers and care recipients with dementia
78	Moehead, A., DeSouza, K., Walsh, K., & Pit, S. W. (2020). A Web-Based Dementia Education Program and its Application to an Australian Web-Based Dementia Care Competency and Training Network: Integrative Systematic Review. Journal of medical Internet research, 22(1), e16808.	A Web-Based Dementia Education Program and its Application to an Australian Web-Based Dementia Care Competency and Training Network: Integrative Systematic Review	Background: Dementia education that meets quality and safety standards is paramount to ensure a highly skilled dementia care workforce. Web-based education provides a flexible and cost-effective medium. To be successful, Web-based education must contain features that promote learning and support knowledge translation into practice. The Dementia Care Competency and Training Network (DCC&TN) has de…	exclude	review article
79	Moyle, W., El Saifi, N., Draper, B., Jones, C., Beattie, E., Shum, D., Thalib, L., Mervin, C., & O Dwyer, S. (2017). Pharmacotherapy of Persons with Dementia in Long-Term Care in Australia: A Descriptive Audit of Central Nervous System Medications. Current drug safety.	Pharmacotherapy of Persons with Dementia in Long-Term Care in Australia: A Descriptive Audit of Central Nervous System Medications	Background: Neuropsychiatric symptoms of dementia are often treated through the prescription of one or more psychotropic medications. However, limited efficacy and potential harmful side-effects has resulted in efforts to reduce the use of psychotropic medication in this population, particularly for those living in long-term care.; Objectives: This study sought to describe the pattern of central …	exclude	not reporting actual interaction between caregivers and care recipients with dementia
80	Mullay, S., Schofield, P. A. T., Clarke, A., & Primrose, W. (2018). 'They're just who they've always been': the intersections of dementia, community and selfhood in Scottish care homes. Ageing & Society, 38(5), 1063-1082.	They're just who they've always been': the intersections of dementia, community and selfhood in Scottish care homes	Issues stemming from differences and similarities in cultural identities affect residents and workforces in care homes in Scotland, as they do across the United Kingdom. Theoretical guidance and policy drivers emphasise the importance of considering cultural diversity when planning or enacting person-centred care processes, regardless of where health or social care takes place. Nevertheless, ther…	exclude	not reporting actual interaction between caregivers and care recipients with dementia
81	Mullay, S., Schofield, P., Clarke, A., & Primrose, W. (2011). Cultural diversity and dementia in Scottish care homes. British Journal of Nursing, 20(12), 716-720.	Cultural diversity and dementia in Scottish care homes	Background: theoretical guidance and policy directives emphasize the necessity of considering the culturally-specific needs of health and social care service users as part of 'person-centred' approaches to care. This article outlines the ideas underpinning an ongoing PhD study of the interactions between care staff and residents which is aimed at gaining insights into how person-centred care is f…	exclude	not reporting actual interaction between caregivers and care recipients with dementia
82	Murray, C. M., Gilbert-Hunt, S., Berndt, A., & de la Perrelle, L. (2016). Promoting participation and engagement for people with dementia through a cognitive stimulation therapy programme delivered by students: A descriptive qualitative study. British Journal of Occupational Therapy, 79(10), 620-628.	Promoting participation and engagement for people with dementia through a cognitive stimulation therapy programme delivered by students: A descriptive qualitative study	Introduction Dementia can affect participation and engagement due to deprivation of cognitive, social and sensory stimulation. To meet this need, educators and a service provider collaborated for occupational therapy students to provide cognitive stimulation therapy for people with dementia. Method We used a published, evidence-based cognitive stimulation therapy programme called ‘Making a Differ…	include
83	Neal, I., du Toit, S. H. J., & Lovarini, M. (2019). The use of technology to promote meaningful engagement for adults with dementia in residential aged care: a scoping review. International psychogeriatrics, 1-23.	The use of technology to promote meaningful engagement for adults with dementia in residential aged care: a scoping review	Introduction: A considerable number of adults with dementia live in residential aged care facilities, where loneliness and boredom are common. Computer-based and electronic technologies have advanced significantly and there is potential for such technologies to improve engagement of residents with dementia. However, the nature and extent of the evidence supporting the use of these technologies is…	exclude	review article
84	Nijhof, N., van Hoof, J., van Rijn, H., & van Gemert-Pijnen, J. E. W. C. (2013). The behavioral outcomes of a technology-supported leisure activity in people with dementia. Technology & Disability, 25(4), 263-273.	The behavioral outcomes of a technology-supported leisure activity in people with dementia	BACKGROUND: This paper presents the results of an evaluation of a technology-supported leisure game for people with dementia in relation to the stimulation of social behavior. OBJECTIVE: In this study we explore the additional impact of technology-supported leisure activities on behavioral outcomes of people with dementia in a nursing home and daycare setting in comparison to a traditional leisur…	exclude	not reporting actual interaction between caregivers and care recipients with dementia
85	Norbergh, K.-G., Helin, Y., Dahl, A., Hellzén, O., & Asplund, K. (2006). Nurses' attitudes towards people with dementia: the semantic differential technique. Nursing ethics, 13(3), 264-274.	Nurses' attitudes towards people with dementia: the semantic differential technique	One important aspect of the nurse-patient relationship is nurses' attitudes towards their patients. Nurses' attitudes towards people with dementia have been studied from a wide range of approaches, but few authors have focused on the structure of these attitudes. This study aimed to identify a structure in licensed practical nurses' attitudes towards people with dementia. Twenty-one group dwellin…	include
86	O'Connor, D., Phinney, A., Smith, A., Small, J., Purves, B., Perry, J., Drance, E., Donnelly, M., Chaudhury, H., & Beattie, L. (2007). Personhood in dementia care: developing a research agenda for broadening the vision. Dementia, 6(1), 121-142.	Personhood in dementia care: developing a research agenda for broadening the vision	Dementia has been understood primarily as a biomedical phenomenon with a trajectory of irrevocable decline related to neurodegenerative changes. However, growing evidence suggests that the performance and behaviour of persons with dementia are not exclusively determined by neuropathology but are also influenced by personal histories, social interactions and social contexts. This evidence shifts a…	exclude	not reporting actual interaction between caregivers and care recipients with dementia
87	Olthof-Nefkens, M. W. L. J., Kruse, H., Derksen, E., de Swart, B. J. M., Nijhuis-van der Sanden, M. W. G., & Kalf, J. G. (2018). Improving Communication between Persons with Mild Dementia and Their Caregivers: Qualitative Analysis of a Practice-Based Logopaedic Intervention. Folia phoniatrica et logopaedica : official organ of the International Association of Logopedics and Phoniatrics (IALP), 70…	Improving Communication between Persons with Mild Dementia and Their Caregivers: Qualitative Analysis of a Practice-Based Logopaedic Intervention	Objective: To identify the essential elements of a newly developed, practice-based logopaedic intervention, which focuses on communication between persons with dementia (PwDs) and their caregivers.; Methods: The intervention of 6 one-hour sessions was conducted and evaluated with 4 PwD-caregiver dyads. Eighteen therapy sessions were video recorded and semi-structured interviews with all dyads and…	exclude	not addressing person-centered care or relationship-centered care
88	Person-centred activities and just one hour per week of social interaction can improve quality of life and reduce agitation for people with dementia. (2019). Canadian Nursing Home, 30(1), 26-26.	Person-centred activities and just one hour per week of social interaction can improve quality of life and reduce agitation for people with dementia	Increasing the amount of social interaction for people with dementia living in care homes to just one hour a week improves quality of life when combined with personalized care.	exclude	non-journal publication
89	Prato, L., Lindley, L., Boyles, M., Robinson, L., & Abley, C. (2019). Empowerment, environment and person-centred care: A qualitative study exploring the hospital experience for adults with cognitive impairment. Dementia, 18(7/8), 2710-2730.	Empowerment, environment and person-centred care: A qualitative study exploring the hospital experience for adults with cognitive impairment	It is acknowledged that there are many challenges to ensuring a positive hospital experience for patients with cognitive impairment. The study ('Improving hospital care for adults with cognitive impairment') aimed to explore the positive and negative experiences of older adults with cognitive impairment (dementia and delirium) and their relatives and/or carers, during an acute hospital stay, from…	include
90	Pritchard, J. C., & Brighty, A. (2015). Caring for older people experiencing agitation. Nursing Standard, 29(30), 49-58.	Caring for older people experiencing agitation	Agitation commonly affects older adults, particularly those living in care homes and in hospital settings. Agitation can be distressing to experience, may be associated with poorer health outcomes and can present a challenge to staff in keeping the person and those around them safe. This article examines why agitation can occur in older people and discusses current best practice, focusing on comm…	exclude	not addressing person-centered care or relationship-centered care
91	Pulsford, D., Duxbury, J. A., & Hadi, M. (2011). A survey of staff attitudes and responses to people with dementia who are aggressive in residential care settings. Journal of Psychiatric & Mental Health Nursing, 18(2), 97-104.	A survey of staff attitudes and responses to people with dementia who are aggressive in residential care settings	Aggression is reportedly common among older people with dementia in residential care. The attitudes of staff in care homes and strategies they use are under researched. Theoretical models that may be used to both understand and respond to such behaviour exist. They are the standard and person-centred paradigms. The aim of this study was to explore the views of nursing staff about aggressive behav…	include
92	Rajkumar, A. P., Ballard, C., Fossey, J., Corbett, A., Woods, B., Orrell, M., Prakash, R., Moniz-Cook, E., & Testad, I. (2016). Apathy and Its Response to Antipsychotic Review and Nonpharmacological Interventions in People With Dementia Living in Nursing Homes: WHELD, a Factorial Cluster Randomized Controlled Trial. Journal of the American Medical Directors Association, 17(8), 741-747.	Apathy and Its Response to Antipsychotic Review and Nonpharmacological Interventions in People With Dementia Living in Nursing Homes: WHELD, a Factorial Cluster Randomized Controlled Trial	Objectives Apathy is common, impactful, and difficult to manage in people with dementia. We evaluated the efficacy of nonpharmacological interventions, exercise, and social interaction, in combination with antipsychotic review, to reduce apathy in people with dementia living in nursing homes in a cluster randomized controlled trial (RCT). Methods Well-being and health for people with dementia (WH…	exclude	not reporting actual interaction between caregivers and care recipients with dementia
93	Reed, M., Shute, R., & Ashton, S. (2017). 'Right then, we've done them all. Time for a tea break!' Person centred interaction: from rhetoric to reality using an occupational approach in dementia care...RCOT (Royal College of Occupational Therapist) Annual Conference 2017. British Journal of Occupational Therapy, 80, 94-94.	Right then, we've done them all. Time for a tea break!' Person centred interaction: from rhetoric to reality using an occupational approach in dementia care	Person centred care is a term which is commonplace in health and social care delivery. The notion of care which validates an individual and centres on a person and their unique perspective of the world underpins Gloucestershire's Dementia Strategy and the locally developed '5 step approach' to supporting those with dementia in care environments (NHS Gloucestershire 2012). It would seem, however, …	exclude	conference publication
94	Samarin, S. D. (2018). Dementia-Specific Education in an Assisted Living Facility.	Dementia-Specific Education in an Assisted Living Facility	Providing competent, high-quality, and person-centered care is important in the healthcare environment, including the care for the aging and training of those who provide care. A knowledge gap in dementia-specific training was identified at an assisted living facility. The purpose of this project was to answer the question whether a dementia-specific educational staff training program would impro…	exclude	dissertation
95	Sampson, E. L., Vickerstaff, V., Lietz, S., & Orrell, M. (2017). Improving the care of people with dementia in general hospitals: evaluation of a whole-system train-the-trainer model. International Psychogeriatrics, 29(4), 605-614.	Improving the care of people with dementia in general hospitals: evaluation of a whole-system train-the-trainer model	Background:There are concerns about the quality of care that people with dementia receive in the general hospital. Staff report a lack of confidence and inadequate training in dementia care.Methods:A train-the-trainer model was implemented across eight acute hospital trusts in London via a large academic health and science network. Impact was evaluated using mixed methods. Data were collected at …	include
96	Savundranayagam, M. Y. (2014). Missed opportunities for person-centered communication: implications for staff-resident interactions in long-term care. International Psychogeriatrics, 26(4), 645-655.	Missed opportunities for person-centered communication: implications for staff-resident interactions in long-term care	Background: Social interactions in long-term care settings between staff and residents with dementia have been characterized as task-oriented, patronizing, and/or overly directive. Long-term care settings can be contexts that emphasize dependency and threaten the personal identity of older residents. Yet, leaders in the long-term care sector have acknowledged recently that dementia care must move…	include
97	Savundranayagam, M. Y., Sibalija, J., & Scotchmer, E. (2016). Resident Reactions to Person-Centered Communication by Long-Term Care Staff. American Journal of Alzheimer's Disease & Other Dementias, 31(6), 530-537.	Resident Reactions to Person-Centered Communication by Long-Term Care Staff	Long-term care staff caregivers who are person centered incorporate the life history, preferences, and feelings of residents with dementia during care interactions. Communication is essential for person-centered care. However, little is known about residents’ verbal reactions when staff use person-centered communication. Accordingly, this study investigated the impact of person-centered communica…	exclude	not reporting actual interaction between caregivers and care recipients with dementia
98	Schneider, J., Hazel, S., Morgner, C., & Dening, T. (2019). Facilitation of positive social interaction through visual art in dementia: a case study using video-analysis. Ageing and society, 39(8), 1731-1751.	Facilitation of positive social interaction through visual art in dementia: a case study using video-analysis	The aims of this exploratory study were: to investigate the process of visual art appreciation in a person with dementia, in real time; and to test the feasibility of using video-analysis as a method to explore this process by and with a person who has minimal verbal expression. Gallery personnel guided a woman with severe dementia around an exhibition. Audio-visual recordings of the interactions…	include
99	Sefcik, J. S., Ersek, M., & Cacchione, P. Z. (2020). Nursing home residents with advanced dementia and persistent vocalisations: Observations of surrounding context. International journal of older people nursing, e12322.	Nursing home residents with advanced dementia and persistent vocalisations: Observations of surrounding context	Purpose: Persistent vocalisations are commonly exhibited by persons with dementia and are often characterised as agitation or aggression. There has been little focus on persistent vocalisations independent from other behavioural and psychological symptoms of dementia making it difficult to differentiate information about the context that surrounds the person with dementia, including the circumsta…	exclude	not reporting actual interaction between caregivers and care recipients with dementia
100	Seifert, L. S., Flaherty, K., & Trill, K. (2013). Beyond person-centered dementia care: The See-Saw Model for Day-to- Day Interactions. Activities Directors' Quarterly for Alzheimer's & Other Dementia Patients, 14(2), 15-31.	Beyond person-centered dementia care: The See-Saw Model for Day-to- Day Interactions	The article focuses on the See-Saw Model for Day-to-Day Interactions in medical care towards older people and those with dementia. It mentions that both dementia care and eldercare were overturned for person-centered caregiving. It also notes the derivation of the model from fair and humane treatment.	include
101	Sharpp, T. J. (2008). An ethnography of dementia care in an assisted living facility, University of California, San Francisco	An ethnography of dementia care in an assisted living facility	The purpose of this study is to examine how care in an assisted living facility (ALF) is provided to residents with dementia. A review of the literature revealed that ALF residents are more cognitively and physically impaired than previously presumed. However, ALFs are not required to employ registered nurses (RNs) or employees who have education in health care. Because so little is known about t…	exclude	dissertation
102	Skingley, A., & Marshall, J. (2018). Challenges of implementing and embedding a programme to improve care for older people with dementia on hospital wards. Nursing older people, 30(7), 29-33.	Challenges of implementing and embedding a programme to improve care for older people with dementia on hospital wards	The authors took part in a national research project that evaluated an intervention to enhance person-centred care for people with dementia in hospital. The Person, Interactions, Environment (PIE) programme involves staff observing care on a ward, focusing on these three areas. Findings from observations form the basis for introducing changes to ward practices. Implementing PIE led to improvement…	include
103	Slaughter, S. E., Morrison-Koechl, J. M., Chaudhury, H., Lengyel, C. O., Carrier, N., & Keller, H. H. (2020). The association of eating challenges with energy intake is moderated by the mealtime environment in residential care homes. International psychogeriatrics, 1-11.	The association of eating challenges with energy intake is moderated by the mealtime environment in residential care homes	Objectives: Given the increased risk of malnutrition in residential care homes, we studied how specific aspects of the mealtime environment are associated with residents' eating challenges and energy intake in general and dementia care units of these homes.; Design: Cross-sectional study.; Participants: 624 residents and 82 dining rooms.; Setting: 32 residential care homes across Canada.; Measure…	exclude	not reporting actual interaction between caregivers and care recipients with dementia
104	Smebye, K. L., & Kirkevold, M. (2013). The influence of relationships on personhood in dementia care: a qualitative, hermeneutic study. BMC Nursing, 12(1), 29-53.	The influence of relationships on personhood in dementia care: a qualitative, hermeneutic study	Background: In dementia personhood can be understood as increasingly concealed rather than lost. The sense of being a person evolves in relationships with others. The aim of this study was to increase the understanding of the nature and quality of relationships between persons with dementia, family carers and professional caregivers and how these relationships influenced personhood in people with…	include
105	Smith, S. J., Parveen, S., Sass, C., Drury, M., Oyebode, J. R., & Surr, C. A. (2019). An audit of dementia education and training in UK health and social care: a comparison with national benchmark standards. BMC Health Services Research, 19(1), N.PAG-N.PAG.	An audit of dementia education and training in UK health and social care: a comparison with national benchmark standards	Background: Despite people living with dementia representing a significant proportion of health and social care users, until recently in the United Kingdom (UK) there were no prescribed standards for dementia education and training. This audit sought to review the extent and nature of dementia education and training offered to health and social care staff in the UK against the standards described…	exclude	not reporting actual interaction between caregivers and care recipients with dementia
106	Snoeren, M., Janssen, B., Niessen, T., & Abma, T. (2016). Nurturing Cultural Change in Care for Older People: Seeing the Cherry Tree Blossom. Health Care Analysis, 24(4), 349-373.	Nurturing Cultural Change in Care for Older People: Seeing the Cherry Tree Blossom	The article discusses a study that analyzed the culture change project of allowing older adults with dementia to participate in leisure and occupational activities in the Netherlands. Topics include collection of data, interviews and observations on spontaneous responses and interactions with no planned interventions. Conclusions indicated cultural transformation and person-centered care attribut…	include
107	Stein-Parbury, J., Chenoweth, L., Jeon, Y., Brodaty, H., Haas, M., & Norman, R. (2012). Implementing Person-Centered Care in Residential Dementia Care. Clinical Gerontologist, 35(5), 404-424.	Implementing Person-Centered Care in Residential Dementia Care	Person-centered care (PCC) for people with dementia is a system of care that is based on the belief that personhood can be maintained despite cognitive impairment. A recently conducted cluster randomized trial (Chenoweth et al., 2009) demonstrated that PCC was effective in reducing agitation in people with dementia who were in residential care. This article provides a detailed overview of the PCC…	exclude	not reporting actual interaction between caregivers and care recipients with dementia
108	Stenhouse, R., Tait, J., Hardy, P., & Sumner, T. (2013). Dangling conversations: reflections on the process of creating digital stories during a workshop with people with early-stage dementia. Journal of Psychiatric & Mental Health Nursing, 20(2), 134-141.	Dangling conversations: reflections on the process of creating digital stories during a workshop with people with early-stage dementia	Care and compassion are key features of the NHS Constitution. Recent reports have identified a lack of compassion in the care and treatment of older people. Nurses draw on aesthetic knowledge, developed through engagement with the experience of others, when providing compassionate care. Patient Voices reflective digital stories are used in healthcare education to facilitate student engagement wit…	include
109	Strandroos, L., & Antelius, E. (2017). Interaction and common ground in dementia: Communication across linguistic and cultural diversity in a residential dementia care setting. Health, 21(5), 538-554.	Interaction and common ground in dementia: Communication across linguistic and cultural diversity in a residential dementia care setting	Previous research concerning bilingual people with a dementia disease has mainly focused on the importance of sharing a spoken language with caregivers. While acknowledging this, this article addresses the multidimensional character of communication and interaction. As using spoken language is made difficult as a consequence of the dementia disease, this multidimensionality becomes particularly i…	include
110	Tawiah, P., Black, M., Scott-Walker, M., Johnson, E., & Vaughan, C. P. (2016). Reducing Antipsychotic Use Through Culture Change: An Interdisciplinary Effort. Annals of Long Term Care, 24(10), 27-32.	Reducing Antipsychotic Use Through Culture Change: An Interdisciplinary Effort	Behavioral and psychological symptoms of dementia (BPSD) represent the most common off-label use for antipsychotic medications. We implemented a quality improvement program using principles of culture change transformation for the staff and residents of a nursing home dementia unit with a goal of transitioning to a person-centered model and reducing the proportion of residents receiving antipsych…	exclude	not reporting actual interaction between caregivers and care recipients with dementia
111	Teitelman, J., Raber, C., & Watts, J. (2010). The power of the social environment in motivating persons with dementia to engage in occupation: qualitative findings. Physical & Occupational Therapy in Geriatrics, 28(4), 321-333.	The power of the social environment in motivating persons with dementia to engage in occupation: qualitative findings	A key element in persons with dementia's occupational engagement is the degree to which the social environment supports participation. This article summarizes the results of a qualitative study of eight assisted living facility residents, that explored volition in persons with moderate dementia. Extensive interviewing and observation were followed by the primary researcher's engagement and docume…	include
112	The two-way benefits of person-centering your caregiving. (2013). Nurse Aide-VIP, 25(4), 11-11.	The two-way benefits of person-centering your caregiving.	The article offers information on benefits of the person centered care with respect to nurses and residents. It mentions that in person centered care, each and every need of the resident is targeted to be met by nurses. According to a research by Sonia Brownie and co-worker of Southern Cross University, those residents who receive person centered care are less often suffer from depression, have e…	exclude	non-journal publication
113	Theijsmeijer, S., de Boo, G. M., & Dröes, R.-M. (2018). A pilot study into person-centred use of photo's in the communication with people with dementia. Tijdschrift voor gerontologie en geriatrie, 49(4), 147-155.	A pilot study into person-centred use of photo's in the communication with people with dementia	Social contact is important for the wellbeing of people. Dementia can complicate social interaction. In two randomized controlled pilot studies, it was investigated whether viewing different types of images together affects the mood and social interaction of people with moderately severe to severe Alzheimer's dementia residing in nursing homes. At the first intervention participants in the experi…	exclude	not reporting actual interaction between caregivers and care recipients with dementia
114	Thomsen, M. (2010). Value of the person centered approach for nursing culture: promoting trust based interactions. Pflege Zeitschrift, 63(11), 672-675.	Value of the person centered approach for nursing culture: promoting trust based interactions	not available	exclude	not dealing with dementia
115	Thyrian, J. R., Eichler, T., Michalowsky, B., Wucherer, D., Reimann, M., Hertel, J., Richter, S., Dreier, A., & Hoffmann, W. (2016). Community-Dwelling People Screened Positive for Dementia in Primary Care: A Comprehensive, Multivariate Descriptive Analysis Using Data from the DelpHi-Study. Journal of Alzheimer's Disease, 52(2), 609-617.	Community-Dwelling People Screened Positive for Dementia in Primary Care: A Comprehensive, Multivariate Descriptive Analysis Using Data from the DelpHi-Study	Background: Efficient help and care for people with dementia (PWD) is dependent on knowledge about PWD in primary care.Objective: This analysis comprehensively describes community-dwelling PWD in primary care with respect to various dementia care specific variables.Methods: The analyses are based on baseline data of the ongoing general practitioner-based, randomized, controlled intervention trial…	exclude	not reporting actual interaction between caregivers and care recipients with dementia
116	Travers, C., Brooks, D., Hines, S., O'Reilly, M., McMaster, M., He, W., MacAndrew, M., Fielding, E., Karlsson, L., & Beattie, E. (2016). Effectiveness of meaningful occupation interventions for people living with dementia in residential aged care: a systematic review. JBI database of systematic reviews and implementation reports, 14(12), 163-225.	Effectiveness of meaningful occupation interventions for people living with dementia in residential aged care: a systematic review	Background: The ability to participate in valued activities, whether for work, leisure or family, is an important aspect of personal identity. In dementia, progressive memory loss means that abilities developed over a lifetime begin to be lost as well, contributing to the loss of self and identity. Some studies have reported that activities or interventions tailored to be meaningful to the person…	exclude	review article
117	Vernooij-Dassen, M., de Boer, A., de Vugt, M. E., Meiland, F. J. M., & Dröes, R. M. (2017). Informal care in dementia and the power of social health. Nederlands tijdschrift voor geneeskunde, 161, D1878.	Informal care in dementia and the power of social health	In this article, we describe the current state of affairs with respect to informal care for people with dementia. We focus on the impact of informal care on the caregiver, caregiving strategies and effective ways to support informal caregivers, including e-health and technological support.- Informal care for people with dementia is intense and has consequences, both positive and negative: 78% of …	exclude	not reporting actual interaction between caregivers and care recipients with dementia
118	Villar, F., Celdrán, M., Serrat, R., Fabà, J., & Martínez, T. (2018). Staff's reactions towards partnered sexual expressions involving people with dementia living in long-term care facilities. Journal of advanced nursing, 74(5), 1189-1198.	Staff's reactions towards partnered sexual expressions involving people with dementia living in long-term care facilities	Aims: To explore staff responses, in terms of common practices, towards partnered sexual relationships in long-term care facilities where one or both people involved have dementia. It also tries to determine personal and institutional factors influencing these responses.; Background: Although some studies, mostly qualitative, have focused on reactions to residents' sexual expressions so far the i…	exclude	not reporting actual interaction between caregivers and care recipients with dementia
119	Villar, F., Serrat, R., & Bravo-Segal, S. (2019). Giving Them a Voice: Challenges to Narrative Agency in People with Dementia. Geriatrics (Basel, Switzerland), 4(1).	Giving Them a Voice: Challenges to Narrative Agency in People with Dementia	In this paper, we argue that the capacity for narrative agency is significantly compromised in individuals with dementia due to at least three factors: (a) Dementia itself, which causes increasing difficulties in constructing and articulating coherent and meaningful stories, and sharing them with others; (b) cultural narratives about dementia, which promote an extremely negative and pessimistic v…	exclude	not addressing person-centered care or relationship-centered care
120	Webb, J. (2017). Conversation takes two: understanding interactions with people with dementia. Disability & Society, 32(7), 1102-1106.	Conversation takes two: understanding interactions with people with dementia	The term ‘person-centred’ underpins dementia policy and approaches to support people with dementia. However, ‘person-centredness’ remains hazy, and words and definitions matter greatly when they are at the heart of defining what happens in people’s lives. Drawing on data from an ongoing project, this article suggests that conversations which include a person with dementia can elucidate how ‘relat…	exclude	not reporting actual interaction between caregivers and care recipients with dementia
121	Whelan, S., Teahan, Á., & Casey, D. (2020). Fostering the Resilience of People With Dementia: A Narrative Literature Review. Frontiers in medicine, 7, 45.	Fostering the Resilience of People With Dementia: A Narrative Literature Review	Background: Resilience is a process through which people use resources to adapt to adversity. Interventions aiming to support resilience in people with dementia have been developed. However, the optimal content, structure and impact of these interventions is unclear. This literature review explores the factors through which interventions foster resilience in people with dementia and examines thei…	exclude	review article
122	Whitaker, R., Ballard, C., Stafford, J., Orrell, M., Moniz-Cook, E., Woods, R. T., Murray, J., Knapp, M., Carlton, B. W., & Fossey, J. (2013). Feasibility study of an optimised person-centred intervention to improve mental health and reduce antipsychotics amongst people with dementia in care homes: study protocol for a randomised controlled trial. Trials, 14(1), 13-13.	Feasibility study of an optimised person-centred intervention to improve mental health and reduce antipsychotics amongst people with dementia in care homes: study protocol for a randomised controlled trial	Background: People living in care homes often have complex mental and physical health problems, disabilities and social needs which are compounded by the use of psychiatric and other drugs. In the UK dementia care is a national priority with a vast impact on services. WHELD combines the most effective elements of existing approaches to develop a comprehensive but practical intervention. This will…	exclude	protocol
123	Whitaker, R., Fossey, J., Ballard, C., Orrell, M., Moniz-Cook, E., Woods, R. T., Murray, J., Stafford, J., Knapp, M., Romeo, R., Carlton, B. W., Testad, I., & Khan, Z. (2014). Improving Well-being and Health for People with Dementia (WHELD): study protocol for a randomised controlled trial. Trials, 15(1), 284-284.	Improving Well-being and Health for People with Dementia (WHELD): study protocol for a randomised controlled trial	Background: People with dementia living in care homes often have complex mental health problems, disabilities and social needs. Providing more comprehensive training for staff working in care home environments is a high national priority. It is important that this training is evidence based and delivers improvement for people with dementia residing in these environments. Well-being and Health for…	exclude	protocol
124	Wijma, E. M., Veerbeek, M. A., Prins, M., Pot, A. M., & Willemse, B. M. (2018). A virtual reality intervention to improve the understanding and empathy for people with dementia in informal caregivers: results of a pilot study. Aging & Mental Health, 22(9), 1115-1123.	A virtual reality intervention to improve the understanding and empathy for people with dementia in informal caregivers: results of a pilot study	Objective: Informal caregivers often experience psychological distress due to the changing functioning of the person with dementia they care for. Improved understanding of the person with dementia reduces psychological distress. To enhance understanding and empathy in caregivers, an innovative technology virtual reality intervention Through the D'mentia Lens (TDL) was developed to experience deme…	exclude	not reporting actual interaction between caregivers and care recipients with dementia
125	Willemse, B. M., Downs, M., Arnold, L., Smit, D., de Lange, J., & Pot, A. M. (2015). Staff-resident interactions in long-term care for people with dementia: the role of meeting psychological needs in achieving residents' well-being. Aging & Mental health, 19(5), 444-452.	Staff-resident interactions in long-term care for people with dementia: the role of meeting psychological needs in achieving residents' well-being	Objectives: The aim of this study is to explore the extent to which staff-resident interactions address or undermine residents' psychological needs and how such interactions are associated with residents' well-being.; Method: Data on staff-resident interactions and residents' well-being were collected for 51 residents from nine long-term care settings using dementia care mapping (DCM). DCM yields…	include
126	Wilson, R., Rochon, E., Leonard, C., & Mihailidis, A. (2012). Formal Caregivers' Perceptions of Effective Communication Strategies while Assisting Residents with Alzheimer's Disease During Activities of Daily Living. Canadian Journal of Speech-Language Pathology & Audiology, 36(4), 314-331.	Formal Caregivers' Perceptions of Effective Communication Strategies while Assisting Residents with Alzheimer's Disease During Activities of Daily Living	This article describes caregivers' perceptions of communication strategies that are useful in their care practice when assisting individuals with moderate and severe Alzheimer's disease (AD) during the completion of activities of daily living (ADLs). A total of 10 formal caregivers participated in one-hour semi-structured focus group interviews (FGIs) conducted at two different long-term care (LT…	include
127	Woods, B., Aguirre, E., Spector, A. E., & Orrell, M. (2012). Cognitive stimulation to improve cognitive functioning in people with dementia. Cochrane Database of Systematic Reviews(2), N.PAG-N.PAG.	Cognitive stimulation to improve cognitive functioning in people with dementia	Cognitive stimulation is an intervention for people with dementia which offers a range of enjoyable activities providing general stimulation for thinking, concentration and memory usually in a social setting, such as a small group. Its roots can be traced back to Reality Orientation (RO), which was developed in the late 1950s as a response to confusion and disorientation in older patients in hosp…	exclude	review article
128	Woods, R. T. (2001). Discovering the person with Alzheimer's disease: cognitive, emotional and behavioural aspects. Aging & Mental Health, 5, 7-16.	Discovering the person with Alzheimer's disease: cognitive, emotional and behavioural aspects	The person-centred approach to dementia care emerges from a new emphasis on the experience of the person with dementia. The person is seen as attempting to manage and cope with their difficulties, through a variety of coping mechanisms. Some are able to seek to maximize their cognitive capacities, and there are a number of strategies now available to assist in this process. However, the emotional…	include
129	Wucherer, D., Thyrian, J. R., Eichler, T., Hertel, J., Kilimann, I., Richter, S., Michalowsky, B., Zwingmann, I., Dreier-Wolfgramm, A., Ritter, C. A., Teipel, S., & Hoffmann, W. (2017). Drug-related problems in community-dwelling primary care patients screened positive for dementia. International psychogeriatrics, 29(11), 1857-1868.	Drug-related problems in community-dwelling primary care patients screened positive for dementia	Background: Older people have a higher risk of drug-related problems (DRPs). However, little is known about the prevalence of DRPs in community-dwelling people who screened positive for dementia. Our study aimed to determine (1) the prevalence and types of DRPs and (2) the socio-demographic and clinical variables associated with DRPs in people screened positive for dementia in primary care.; Meth…	exclude	not reporting actual interaction between caregivers and care recipients with dementia
130	Yasuda, M., & Sakakibara, H. (2017). Care staff training based on person-centered care and dementia care mapping, and its effects on the quality of life of nursing home residents with dementia. Aging & Mental Health, 21(9), 991-996.	Care staff training based on person-centered care and dementia care mapping, and its effects on the quality of life of nursing home residents with dementia	Objectives:To assess the effects of care staff training based on person-centered care (PCC) and dementia care mapping (DCM) on the quality of life (QOL) of residents with dementia in a nursing home. Methods:An intervention of staff training based on PCC and DCM was conducted with 40 care staff members at a geriatric nursing home. The effects of the staff training on the QOL of residents with deme…	exclude	not reporting actual interaction between caregivers and care recipients with dementia
131	Younger, D., & Martin, G. W. (2000). Dementia care mapping: an approach to quality audit of services for people with dementia in two health districts. Journal of Advanced Nursing (Wiley-Blackwell), 32(5), 1206-1212.	Dementia care mapping: an approach to quality audit of services for people with dementia in two health districts	The audit reported in this paper and submitted to the Psychiatry of Old Age Management group, assessed six units within each of two health districts in the UK. Using a nonparticipatory observation method in the units selected, the aim was to measure quality and the environment of care. Dependency levels of the clients/residents were also estimated to give a clearer picture of the setting and the …	exclude	not reporting actual interaction between caregivers and care recipients with dementia

## Sheet: Table 3
Supplementary Table 3. Articles for full text screen.
No.	Reference	Exclude/Include	Reason for exclusion
1	Abbott, K. M., Bettger, J. P., Hampton, K., & Kohler, H.-P. (2012). Exploring the use of social network analysis to measure social integration among older adults in assisted living. Family & Community Health, 35(4), 322-333.	Exclude	not reporting actual interaction between caregivers and care recipients with dementia
2	Abbott, K. M., Sefcik, J. S., & Van Haitsma, K. (2017). Measuring social integration among residents in a dementia special care unit versus traditional nursing home: A pilot study. Dementia, 16(3), 388-403.	Exclude	not reporting actual interaction between caregivers and care recipients with dementia, but quantify the interaction type (e.g. verbal), location, context, quality, frequency and duration.
3	Allwood, R., Pilnick, A., O'Brien, R., Goldberg, S., Harwood, R. H., & Beeke, S. (2017). Should I stay or should I go? How healthcare professionals close encounters with people with dementia in the acute hospital setting. Social Science & Medicine, 191, 212-225.	Exclude	the study focused on analysing conversations occurred during interactions between healthcare professionals and patients with dementia. Can't determine if these interactions were in accordance with person-centered dementia care
4	Alsawy, S., Tai, S., McEvoy, P., & Mansell, W. (2020). 'It's nice to think somebody's listening to me instead of saying "oh shut up"'. People with dementia reflect on what makes communication good and meaningful. Journal of Psychiatric & Mental Health Nursing, 27(2), 151-161	Include
5	Andersen, E. M., Kristiansen, E. D., & Rasmussen, G. (2019). Routines of "sitting" and "enjoying ourselves" in the common room of a dementia unit. Logopedics, phoniatrics, vocology, 44(1), 23-30.	Exclude	the study focused on analysing conversations occurred during interactions between caregivers and a resident with dementia. Can't determine if these interactions were in accordance with person-centered dementia care
6	Baillie, L., Sills, E., & Thomas, N. (2016). Educating a health service workforce about dementia: a qualitative study. Quality in Ageing & Older Adults, 17(2), 119-130.	Exclude	not reporting actual interaction between caregivers and care recipients with dementia
7	Bergland, Å., Johansen, H., & Sellevold, G. S. (2015). A qualitative study of professional caregivers' perceptions of processes contributing to mealtime agitation in persons with dementia in nursing home wards and strategies to attain calmness. Nursing open, 2(3), 119-129	Include
8	Boersma, P., van Weert, J. C. M., Lissenberg-Witte, B. I., van Meijel, B., & Dröes, R.-M. (2019). Testing the Implementation of the Veder Contact Method: A Theatre-Based Communication Method in Dementia Care. The Gerontologist, 59(4), 780-791.	Exclude	not reporting actual interaction between caregivers and care recipients with dementia
9	Brataas, H. V., Bjugan, H., Wille, T., & Hellzen, O. (2010). Experiences of day care and collaboration among people with mild dementia. Journal of Clinical Nursing, 19(19-20), 2839-2848.	Include
10	Clare, M. (2014). Soothing sounds: reducing agitation with music therapy. British Journal of Healthcare Assistants, 8(4), 190-195.	Exclude	not reporting actual interaction between caregivers and care recipients with dementia
11	Cooney, A., Hunter, A., Murphy, K., Casey, D., Devane, D., Smyth, S., Dempsey, L., Murphy, E., Jordan, F., & O'Shea, E. (2014). 'Seeing me through my memories': a grounded theory study on using reminiscence with people with dementia living in long-term care. Journal of clinical nursing, 23(23-24), 3564-3574.	Include
12	Cope, S. (2018). The power of collective action. Australian Journal of Dementia Care, 7(6), 28-30.	Exclude	not reporting actual interaction between caregivers and care recipients with dementia
13	de Boer, B., Beerens, H. C., Katterbach, M. A., Viduka, M., Willemse, B. M., & Verbeek, H. (2018). The Physical Environment of Nursing Homes for People with Dementia: Traditional Nursing Homes, Small-Scale Living Facilities, and Green Care Farms. Healthcare (Basel, Switzerland), 6(4).	Exclude	not reporting actual interaction between caregivers and care recipients with dementia
14	de Rooij, A. H. P. M., Luijkx, K. G., Spruytte, N., Emmerink, P. M. J., Schols, J. M. G. A., & Declercq, A. G. (2012). Family caregiver perspectives on social relations of elderly residents with dementia in small-scale versus traditional long-term care settings in the Netherlands and Belgium. Journal of Clinical Nursing, 21(21-22), 3106-3116.	Include
15	Ericson‐Lidman, E., Larsson, L. l. F., & Norberg, A. (2014). Caring for people with dementia disease ( DD) and working in a private not-for-profit residential care facility for people with DD. Scandinavian Journal of Caring Sciences, 28(2), 337-346	Include
16	Ferdous, F., & Moore, K. D. (2015). Field Observations into the Environmental Soul: Spatial Configuration and Social Life for People Experiencing Dementia. American Journal of Alzheimer's Disease & Other Dementias, 30(2), 209-218	Exclude	not reporting actual interaction between caregivers and care recipients with dementia
17	Gilmore-Bykovskyi, A. L. (2015). Caregiver person-centeredness and behavioral symptoms during mealtime interactions: Development and feasibility of a coding scheme. Geriatric Nursing, S10-S15.	Include
18	Gilson, A., Dodds, D., Kaur, A., Potteiger, M., & Ford Ii, J. H. (2019). Using Computer Tablets to Improve Moods for Older Adults With Dementia and Interactions With Their Caregivers: Pilot Intervention Study. JMIR formative research, 3(3), e14530.	Exclude	not reporting actual interaction between caregivers and care recipients with dementia
19	Graneheim, U. H., Jansson, L., & Lindgren, B.-M. (2015). Hovering between Heaven and Hell: An Observational Study Focusing on the Interactions between One Woman with Schizophrenia, Dementia, and Challenging Behaviour and her Care Providers. Issues in Mental Health Nursing, 36(7), 543-550.	Include
20	Griffin, J. M., Riffin, C., Havyer, R. D., Biggar, V. S., Comer, M., Frangiosa, T. L., & Bangerter, L. R. (2019). Integrating Family Caregivers of People With Alzheimer's Disease and Dementias into Clinical Appointments: Identifying Potential Best Practices. Journal of applied gerontology,	Exclude	not reporting actual interaction between caregivers and care recipients with dementia
21	Handley, M., Bunn, F., & Goodman, C. (2019). Supporting general hospital staff to provide dementia sensitive care: A realist evaluation. International Journal of Nursing Studies, 96, 61-71.	Exclude	evaluation of an intervention, not reporting actual interaction between caregivers and care recipients with dementia
22	Hawkes, T., Luff, T., & Gee, S. B. (2019). Supporting Person-Centred Dementia Care for People with Intellectual Disabilities Using the Person, Interaction, Environment Programme. New Zealand Journal of Occupational Therapy, 66(1), 12-18.	Exclude	implementation of person-centered dementia care, but not reporting actual interaction between caregivers anc care recipients with dementia
23	Heap, C. J., & Wolverson, E. (2018). Intensive Interaction and discourses of personhood: A focus group study with dementia caregivers. Dementia, 1471301218814389.	Exclude	one day training on intensive interaction, not reporting actual interaction between caregivers and care recipients with dementia
24	Hung, L., Au-Yeung, A., Helmer, C., Ip, A., Elijah, L., Wilkins-Ho, M., & Chaudhury, H. (2018). Feasibility and acceptability of an iPad intervention to support dementia care in the hospital setting. Contemporary Nurse: A Journal for the Australian Nursing Profession, 54(4/5), 350-361.	Include
25	Jaycock, S., Persaud, M., & Johnson, R. (2006). The effectiveness of dementia care mapping in intellectual disability residential services: a follow-up study. Journal of intellectual disabilities, 10(4), 365-375.	Include
26	Jeon, Y.-H., Luscombe, G., Chenoweth, L., Stein-Parbury, J., Brodaty, H., King, M., & Haas, M. (2012). Staff outcomes from the Caring for Aged Dementia Care REsident Study (CADRES): A cluster randomised trial. International Journal of Nursing Studies, 49(5), 508-518.	Include
27	Kelley, R., Godfrey, M., & Young, J. (2019). The impacts of family involvement on general hospital care experiences for people living with dementia: An ethnographic study. International Journal of Nursing Studies, 96, 72-81.	Include
28	Kolanowski, A., Behrens, L., Lehman, E., Oravecz, Z., Resnick, B., Boltz, M., Van Haitsma, K., Galik, E., Ellis, J., & Eshraghi, K. (2020). Living Well With Dementia: Factors Associated With Nursing Home Residents' Affect Balance. Research in Gerontological Nursing, 13(1), 21-30.	Exclude	not reporting actual interaction between caregivers and care recipients with dementia
29	Lykkeslet, E., Gjengedal, E., Skrondal, T., & Storjord, M.-B. (2014). Sensory stimulation - a way of creating mutual relations in dementia care. International journal of qualitative studies on health and well-being, 9, 23888.	Exclude	not reporting actual interaction between caregivers and care recipients with dementia
30	Murray, C. M., Gilbert-Hunt, S., Berndt, A., & de la Perrelle, L. (2016). Promoting participation and engagement for people with dementia through a cognitive stimulation therapy programme delivered by students: A descriptive qualitative study. British Journal of Occupational Therapy, 79(10), 620-628.	Exclude	not reporting actual interaction between caregivers and care recipients with dementia
31	Norbergh, K.-G., Helin, Y., Dahl, A., Hellzén, O., & Asplund, K. (2006). Nurses' attitudes towards people with dementia: the semantic differential technique. Nursing ethics, 13(3), 264-274.	Include
32	Prato, L., Lindley, L., Boyles, M., Robinson, L., & Abley, C. (2019). Empowerment, environment and person-centred care: A qualitative study exploring the hospital experience for adults with cognitive impairment. Dementia, 18(7/8), 2710-2730.	Exclude	identified factors that contribute to a positive or negative hospital stay, not reporting actual interaction according to person-centered care principles
33	Pulsford, D., Duxbury, J. A., & Hadi, M. (2011). A survey of staff attitudes and responses to people with dementia who are aggressive in residential care settings. Journal of Psychiatric & Mental Health Nursing, 18(2), 97-104.	Include
34	Sampson, E. L., Vickerstaff, V., Lietz, S., & Orrell, M. (2017). Improving the care of people with dementia in general hospitals: evaluation of a whole-system train-the-trainer model. International Psychogeriatrics, 29(4), 605-614.	Exclude	not reporting actual interaction between caregivers and care recipients with dementia
35	Savundranayagam, M. Y. (2014). Missed opportunities for person-centered communication: implications for staff-resident interactions in long-term care. International Psychogeriatrics, 26(4), 645-655.	Include
36	Schneider, J., Hazel, S., Morgner, C., & Dening, T. (2019). Facilitation of positive social interaction through visual art in dementia: a case study using video-analysis. Ageing and society, 39(8), 1731-1751.	Exclude	the study reported interaction with gallery staff, not reporting actual interaction with caregivers
37	Seifert, L. S., Flaherty, K., & Trill, K. (2013). Beyond person-centered dementia care: The See-Saw Model for Day-to- Day Interactions. Activities Directors' Quarterly for Alzheimer's & Other Dementia Patients, 14(2), 15-31.	Exclude	not addressing person-centered care
38	Skingley, A., & Marshall, J. (2018). Challenges of implementing and embedding a programme to improve care for older people with dementia on hospital wards. Nursing older people, 30(7), 29-33.	Exclude	not reporting actual interaction between caregivers and care recipients with dementia
39	Smebye, K. L., & Kirkevold, M. (2013). The influence of relationships on personhood in dementia care: a qualitative, hermeneutic study. BMC Nursing, 12(1), 29-53.	Exclude	focused on relationship, rather than actual interaction
40	Snoeren, M., Janssen, B., Niessen, T., & Abma, T. (2016). Nurturing Cultural Change in Care for Older People: Seeing the Cherry Tree Blossom. Health Care Analysis, 24(4), 349-373.	Include
41	Stenhouse, R., Tait, J., Hardy, P., & Sumner, T. (2013). Dangling conversations: reflections on the process of creating digital stories during a workshop with people with early-stage dementia. Journal of Psychiatric & Mental Health Nursing, 20(2), 134-141.	Exclude	not reporting actual interaction between caregivers and care recipients with dementia
42	Strandroos, L., & Antelius, E. (2017). Interaction and common ground in dementia: Communication across linguistic and cultural diversity in a residential dementia care setting. Health, 21(5), 538-554.	Include
43	Teitelman, J., Raber, C., & Watts, J. (2010). The power of the social environment in motivating persons with dementia to engage in occupation: qualitative findings. Physical & Occupational Therapy in Geriatrics, 28(4), 321-333.	Include
44	Willemse, B. M., Downs, M., Arnold, L., Smit, D., de Lange, J., & Pot, A. M. (2015). Staff-resident interactions in long-term care for people with dementia: the role of meeting psychological needs in achieving residents' well-being. Aging & Mental health, 19(5), 444-452.	Include
45	Wilson, R., Rochon, E., Leonard, C., & Mihailidis, A. (2012). Formal Caregivers' Perceptions of Effective Communication Strategies while Assisting Residents with Alzheimer's Disease During Activities of Daily Living. Canadian Journal of Speech-Language Pathology & Audiology, 36(4), 314-331.	Include
46	Woods, R. T. (2001). Discovering the person with Alzheimer's disease: cognitive, emotional and behavioural aspects. Aging & Mental Health, 5, 7-16.	Exclude	Narrative discussion and review of the literature, not reporting actual interaction

## Sheet: Table 4
Supplementary Table 4. Articles included in review.
No.	References
1	Alsawy S, Tai S, McEvoy P, Mansell W. 'It's nice to think somebody's listening to me instead of saying "oh shut up"'. People with dementia reflect on what makes communication good and meaningful. Journal of psychiatric and mental health nursing. 2020;27(2):151-161.
2	Bergland Å, Johansen H, Sellevold GS. A qualitative study of professional caregivers' perceptions of processes contributing to mealtime agitation in persons with dementia in nursing home wards and strategies to attain calmness. Nursing Open. 2015;2(3):119-129.
3	Brataas HV, Bjugan H, Wille T, Hellzen O. Experiences of day care and collaboration among people with mild dementia. Journal Of Clinical Nursing. 2010;19(19-20):2839-2848.
4	Cooney A, Hunter A, Murphy K, et al. 'Seeing me through my memories': a grounded theory study on using reminiscence with people with dementia living in long-term care. Journal Of Clinical Nursing. 2014;23(23-24):3564-3574.
5	de Rooij AHPM, Luijkx KG, Spruytte N, Emmerink PMJ, Schols JMGA, Declercq AG. Family caregiver perspectives on social relations of elderly residents with dementia in small-scale versus traditional long-term care settings in the Netherlands and Belgium. Journal of Clinical Nursing. 2012;21(21/22):3106-3116.
6	Ericson-Lidman E, Larsson L-lF, Norberg A. Caring for people with dementia disease (DD) and working in a private not-for-profit residential care facility for people with DD. Scandinavian Journal of Caring Sciences. 2014;28(2):337-346.
7	Gilmore-Bykovskyi AL. Caregiver person-centeredness and behavioral symptoms during mealtime interactions: Development and feasibility of a coding scheme. Geriatric Nursing. 2015;36(2):S10-S15.
8	Graneheim UH, Jansson L, Lindgren B-M. Hovering between Heaven and Hell: An Observational Study Focusing on the Interactions between One Woman with Schizophrenia, Dementia, and Challenging Behaviour and her Care Providers. Issues in Mental Health Nursing. 2015;36(7):543-550.
9	Heggestad AKT, Nortvedt P, Slettebø Å. Dignity and care for people with dementia living in nursing homes. Dementia (London, England). 2015;14(6):825-841.
10	Hung L, Au-Yeung A, Helmer C, et al. Feasibility and acceptability of an iPad intervention to support dementia care in the hospital setting. Contemporary nurse. 2018;54(4-5):350-361.
11	Jaycock S, Persaud M, Johnson R. The effectiveness of dementia care mapping in intellectual disability residential services: a follow-up study. Journal of Intellectual Disabilities. 2006;10(4):365-375.
12	Jeon Y-H, Luscombe G, Chenoweth L, et al. Staff outcomes from the Caring for Aged Dementia Care REsident Study (CADRES): A cluster randomised trial. International Journal of Nursing Studies. 2012;49(5):508-518.
13	Kelley R, Godfrey M, Young J. The impacts of family involvement on general hospital care experiences for people living with dementia: An ethnographic study. International journal of nursing studies. 2019;96:72-81.
14	Norbergh K-G, Helin Y, Dahl A, Hellzén O, Asplund K. Nurses' attitudes towards people with dementia: the semantic differential technique. Nursing Ethics. 2006;13(3):264-274.
15	Plejert C, Jansson G, Yazdanpanah M. Response practices in multilingual interaction with an older Persian woman in a Swedish residential home. Journal of cross-cultural gerontology. 2014;29(1):1-23.
16	Pulsford D, Duxbury JA, Hadi M. A survey of staff attitudes and responses to people with dementia who are aggressive in residential care settings. Journal of Psychiatric & Mental Health Nursing. 2011;18(2):97-104.
17	Ryan T, Nolan M, Reid D, Enderby P. Using the senses framework to achieve relationship-centred dementia care services: a case example. Dementia (14713012). 2008;7(1):71-93.
18	Savundranayagam, M. Y. (2014). Missed opportunities for person-centered communication: implications for staff-resident interactions in long-term care. International Psychogeriatrics, 26(4), 645-655.
19	Scerri A, Innes A, Scerri C. Discovering what works well: exploring quality dementia care in hospital wards using an appreciative inquiry approach. Journal of Clinical Nursing. 2015;24(13/14):1916-1925.
20	Snoeren MMWC, Janssen BM, Niessen TJH, Abma TA. Nurturing Cultural Change in Care for Older People: Seeing the Cherry Tree Blossom. Health Care Analysis: HCA: Journal Of Health Philosophy And Policy. 2014.
21	Strandroos L, Antelius E. Interaction and common ground in dementia: Communication across linguistic and cultural diversity in a residential dementia care setting. Health (London, England: 1997). 2017;21(5):538-554.
22	Teitelman J, Raber C, Watts J. The power of the social environment in motivating persons with dementia to engage in occupation: qualitative findings. Physical & Occupational Therapy in Geriatrics. 2010;28(4):321-333.
23	Watson J. Developing the Senses Framework to support relationship-centred care for people with advanced dementia until the end of life in care homes. Dementia (London, England). 2016.
24	Willemse BM, Downs M, Arnold L, Smit D, de Lange J, Pot AM. Staff–resident interactions in long-term care for people with dementia: the role of meeting psychological needs in achieving residents’ well-being. Aging & Mental Health. 2015;19(5):444-452.
25	Wilson CB, Davies S. Developing relationships in long term care environments: the contribution of staff. Journal of Clinical Nursing. 2009;18(12):1746-1755.

## Sheet: Table 5
Supplementary Table 5. Study characteristics.
Studies	Year of publication	Countries	Study setting	Study aim	Design/method/participant
Alsawy, S., et al., 'It's nice to think somebody's listening to me instead of saying "oh shut up"'. People with dementia reflect on what makes communication good and meaningful. Journal of psychiatric and mental health nursing, 2020. 27(2): p. 151-161.	2020	UK	Home	To explore what makes communication with their family carers meaningful from the perspective of people living with dementia.	A qualitative approach was adopted involving video method as a reflective tool alongside semi‐structured interviews with nine people with dementia who were cared for by their family members. Each participant was filmed during an interactive activity of their choice for 12-15 minutes. He/she was then shown the film footage and interviewed for what made communication meaningful.
Bergland, Å., Johansen, H., & Sellevold, G. S. (2015). A qualitative study of professional caregivers' perceptions of processes contributing to mealtime agitation in persons with dementia in nursing home wards and strategies to attain calmness. Nursing Open, 2(3), 119-129.	2015	Norway	Residential aged care	(1) To describe professional caregivers’ perceptions of factors and processes contributing to mealtime agitation in residential aged care homes for people with dementia (2) To describe professional caregivers’ strategies for attaining and maintaining calm mealtimes	Qualitative focus group interviews and reflection groups with 24 professional caregivers in two of the six wards of a residential aged care home.
Brataas, H. V., Bjugan, H., Wille, T., & Hellzen, O. (2010). Experiences of day care and collaboration among people with mild dementia. Journal Of Clinical Nursing, 19(19-20), 2839-2848.	2010	Norway	Community day care program	To explore, from a client perspective, whether and how person-centred and collaborative client group care, provided for limited time, gave meaning to the everyday lives of persons with mild dementia who are living at home	Qualitative interviews with nine clients of a community day care program.
Cooney, A., Hunter, A., Murphy, K., Casey, D., Devane, D., Smyth, S., Dempsey, L., Murphy, E., Jordan, F., & O'Shea, E. (2014). 'Seeing me through my memories': a grounded theory study on using reminiscence with people with dementia living in long-term care. Journal Of Clinical Nursing, 23(23-24), 3564-3574.	2014	UK	Residential aged care	To understand people with dementia, staff and relatives perspectives on reminiscence, its impact on their lives and experience of care and care giving.	Qualitative interviews with 11 people with dementia, five relatives, 10 healthcare assistants, 9 registered nurses and three nursing managers in four residential aged care homes.
de Rooij, A. H. P. M., Luijkx, K. G., Spruytte, N., Emmerink, P. M. J., Schols, J. M. G. A., & Declercq, A. G. (2012). Family caregiver perspectives on social relations of elderly residents with dementia in small-scale versus traditional long-term care settings in the Netherlands and Belgium. Journal of Clinical Nursing, 21(21/22), 3106-3116.	2012	The Netherlands and Belgium	Residential aged care	To provide insight into family caregiver perspectives on social relations within the ‘caregiving triangle’ between family caregiver, professional caregiver and elderly resident with dementia. Specifically on: (1) the interaction between family caregiver and resident? (2) the interaction between professional caregiver and resident? (3) the interaction between family caregiver and professional care…	Quasi-experimental design with two measurement moments (i.e. baseline and after 12 months) using a questionnaire survey. 64 family caregivers in four traditional and 12 small scale residential aged care settings were surveyed.
Ericson-Lidman, E., Larsson, L.-l. F., & Norberg, A. (2014). Caring for people with dementia disease (DD) and working in a private not-for-profit residential care facility for people with DD. Scandinavian Journal of Caring Sciences, 28(2), 337-346.	2014	Sweden	Residential aged care	To explore care providers’ narrated experiences of caring for people with dementia and working in a private not-for-profit residential care facility for people with dementia.	Qualitative interviews with 12 caregivers in a residential aged care home.
Gilmore-Bykovskyi, A. L. (2015). Caregiver person-centeredness and behavioral symptoms during mealtime interactions: Development and feasibility of a coding scheme. Geriatric Nursing, 36(2), S10-S15.	2015	US	Residential aged care	To develop procedures for collecting and coding sequential data from naturally-occurring caregiver-resident mealtime interactions. Specific objectives were to (1) determine the acceptability and feasibility of these procedures (2) assess the feasibility, ease of use and inter-rater reliability of the developed coding scheme (3) explore the clinical utility of the coding scheme for informing impro…	A video-recorded, descriptive, observational study of mealtime care interactions between caregivers and residents with dementia in two residential aged care homes.
Graneheim, U. H., Jansson, L., & Lindgren, B.-M. (2015). Hovering between Heaven and Hell: An Observational Study Focusing on the Interactions between One Woman with Schizophrenia, Dementia, and Challenging Behaviour and her Care Providers. Issues in Mental Health Nursing, 36(7), 543-550.	2015	Sweden	Residential aged care	To illuminate the interactions between a person with schizophrenia, dementia, and challenging behaviour and her professional caregivers	Qualitative observation and informal interviews with a person with dementia and the seven professional caregivers of this person. 94 hours of observation, seven informal interviews.
Heggestad, A. K. T., Nortvedt, P., & Slettebø, Å. (2015). Dignity and care for people with dementia living in nursing homes. Dementia (London, England), 14(6), 825-841.	2015	Norway	Residential aged care	To gain more knowledge about how people with dementia, and their relatives, experience that dignity being maintained or harmed in nursing homes	Participant observation and interviews in two residential aged care homes. 184.5 hours of observation of 15 people with dementia, interviews with seven relatives.
Hung, L., Au-Yeung, A., Helmer, C., Ip, A., Elijah, L., Wilkins-Ho, M., & Chaudhury, H. (2018). Feasibility and acceptability of an iPad intervention to support dementia care in the hospital setting. Contemporary nurse, 54(4-5), 350-361. https://doi.org/10.1080/10376178.2018.1505436	2018	Canada	Hospital	To explore the feasibility and acceptability of using an iPad Simulated Presence Therapy intervention with hospitalized older people with dementia.	A mixed-method study, involving an iPad Simulated Presence Therapy intervention. Video ethnographic methods including observation and video recording of care interactions were used. 200 minutes of film footage of four older people with dementia and field notes were taken to supplement the footage. Semi-structured interviews were conducted with 2 caregivers.
Jaycock, S., Persaud, M., & Johnson, R. (2006). The effectiveness of dementia care mapping in intellectual disability residential services: a follow-up study. Journal of Intellectual Disabilities, 10(4), 365-375.	2006	UK	Intellectual disability residential service	(1) To further investigate the suitability of the dementia care mapping tool for use within intellectual disability services (2) To explore the impact of ‘mapping’ on staff and their perceptions of the tool to assist service improvement and the provision of person-centred care in intellectual disability residential services	Observation and semi-structured interviews in intellectual disability services. 120 hours of observation of 14 people with intellectual disabilities, interviews with 16 caregivers.
Jeon, Y.-H., Luscombe, G., Chenoweth, L., Stein-Parbury, J., Brodaty, H., King, M., & Haas, M. (2012). Staff outcomes from the Caring for Aged Dementia Care REsident Study (CADRES): A cluster randomised trial. International Journal of Nursing Studies, 49(5), 508-518.	2012	Australia	Residential aged care	To investigate the impact of person-centred care and dementia care mapping interventions compared to each other and to usual dementia care on staff outcomes	A cluster-randomised, controlled trial in 12 urban residential aged care homes. 194 caregivers completed baseline assessment, 124 completed follow-up assessment at all three time points.
Kelley, R., M. Godfrey, and J. Young, The impacts of family involvement on general hospital care experiences for people living with dementia: An ethnographic study. International journal of nursing studies, 2019. 96: p. 72-81.	2019	UK	Hospital	To explore the processes through which families are involved in general hospital dementia care, and the impacts of their involvement on care experiences.	An ethnographic approach, involving 400 hours of participant observations of 12 people with dementia, informal conversations, and 46 in-depth interviews with 23 caregivers, 11 family members and four people with dementia.
Norbergh, K.-G., Helin, Y., Dahl, A., Hellzén, O., & Asplund, K. (2006). Nurses' attitudes towards people with dementia: the semantic differential technique. Nursing Ethics, 13(3), 264-274.	2006	Sweden	Residential aged care	To identify a structure in licensed practical nurses’ attitudes towards people with dementia	Questionnaire survey in 21 group dwelling units 11 residential aged care homes. One questionnaire per person with dementia was sent to all licensed practical nurses on each unit. Total 178 people with dementia and 181 licensed practical nurses.
Plejert, C., Jansson, G., & Yazdanpanah, M. (2014). Response practices in multilingual interaction with an older Persian woman in a Swedish residential home. Journal of cross-cultural gerontology, 29(1), 1-23.	2014	Sweden	Residential aged care	To demonstrate the response practices in multilingual interaction between an older Persian woman with dementia and her caregivers	A case study based on one single audio recording during morning care of a Farsi speaking female with dementia who were cared by two caregivers who did not speak Farsi.
Pulsford, D., Duxbury, J. A., & Hadi, M. (2011). A survey of staff attitudes and responses to people with dementia who are aggressive in residential care settings. Journal of Psychiatric & Mental Health Nursing, 18(2), 97-104.	2011	UK	Residential aged care	(1) To explore the views of nurses, and care staff as to the causes of, and most effective ways of responding to aggressive behaviour by older people with dementia in residential care (2) To explore the strategies used in practice to respond to such behaviour in residential settings	A questionnaire survey with 36 caregivers and an audit of 79 aggressive incidents involving 31 older people with dementia in four residential aged care homes
Ryan, T., Nolan, M., Reid, D., & Enderby, P. (2008). Using the senses framework to achieve relationship-centred dementia care services: a case example. Dementia (14713012), 7(1), 71-93.	2008	UK	Community dementia support service	To describe the development of a new service for people with dementia and their carers in a large post-industrial city in the north of England, UK. Three primary aims are: (1) To make recommendations about respite services for people with dementia and their carers (2) To investigate citywide trends in respite care use amongst carers supporting people with dementia (3) To draw upon the experiences…	Questionnaire survey and interviews with people with dementia and their caregivers.
Savundranayagam, M. Y. (2014). Missed opportunities for person-centered communication: implications for staff-resident interactions in long-term care. International Psychogeriatrics, 26(4), 645-655.	2014	US	Residential aged care	(1) The first objective was to assess whether staff–resident interactions during routine caregiving tasks were person-centered. (2) The second objective was to assess the extent to which staff miss opportunities to use person centered communication strategies.	Conversations (N = 46) involving 13 staff–resident dyads were audio-recorded in a nursing home located in a large metropolitan city in the US.
Scerri, A., Innes, A., & Scerri, C. (2015). Discovering what works well: exploring quality dementia care in hospital wards using an appreciative inquiry approach. Journal of Clinical Nursing, 24(13/14), 1916-1925.	2015	Malta	Geriatric hospital	To explore quality dementia care from the point of view of formal care workers and family members of inpatients with dementia by asking them to remember and narrate the most positive care experiences in relation to caring for patients with dementia in hospital. Factors that led to these positive experiences were also sought.	An exploratory qualitative design. 33 caregivers and 10 family members of people with dementia were interviewed.
Snoeren, M. M. W. C., Janssen, B. M., Niessen, T. J. H., & Abma, T. A. (2014). Nurturing Cultural Change in Care for Older People: Seeing the Cherry Tree Blossom. Health Care Analysis: HCA: Journal Of Health Philosophy And Policy.	2014	UK	Residential aged care	To examine what has contributed to the improvement of participation of older people with dementia in daily occupational and leisure activities according to practitioners.	Action research with a case study using participant observation, interviews and focus group methods. Participant observations of residents' actions and expressions. Semi-structured individual interviews with five co-researchers. Two focus groups with seven medical and allied health professionals. One focus group with six family members. Two focus groups with seven nursing team members.
Strandroos, L., & Antelius, E. (2017). Interaction and common ground in dementia: Communication across linguistic and cultural diversity in a residential dementia care setting. Health (London, England: 1997), 21(5), 538-554.	2017	Sweden	Residential aged care	To investigate care and interactional practices, that is, the organisation of communicative encounters between residents and care staff, who are of diverse linguistic and cultural backgrounds, at a Swedish residential dementia care facility.	Ethnographic field study.Field observations of 19 residents with dementia during one-year time period, 60 hours of video recordings and six interviews with caregivers.
Teitelman, J., Raber, C., & Watts, J. (2010). The power of the social environment in motivating persons with dementia to engage in occupation: qualitative findings. Physical & Occupational Therapy in Geriatrics, 28(4), 321-333.	2010	US	Residential aged care	(1) To reflect lived experiences of people with mid-stage dementia in person-centered care. (2) To explore the role of occupational therapy in supporting personhood in dementia, with a particular focus on the role of volition (motivation) in everyday occupations.	Qualitative case studies using participant observation and interview methods. Participant observations of eight residents with dementia. Interviews with family members and caregivers.
Watson, J. (2016). Developing the Senses Framework to support relationship-centred care for people with advanced dementia until the end of life in care homes. Dementia (London, England).	2016	UK	Residential aged care	(1) How is embodied and inter-embodied selfhood enacted in day-to-day care in a care home? . (2) What is the role of embodied and inter-embodied selfhood in ensuring people with advanced dementia remain active agents in their relationships until the end of life? (3) What role does embodied and inter-embodied selfhood play in promoting relationshipcentred care?	Ethographic field study with 20 residents with dementia and 33 caregivers.195 hours of observations, 24 interviews with caregivers and three focus group discussions with caregivers were conducted.Care plans and daily records of residents were also examined.
Willemse, B. M., Downs, M., Arnold, L., Smit, D., de Lange, J., & Pot, A. M. (2015). Staff–resident interactions in long-term care for people with dementia: the role of meeting psychological needs in achieving residents’ well-being. Aging & Mental Health, 19(5), 444-452.	2015	UK/Australia	Residential aged care	(1) How many PEs and PDs do residents experience in a six-hour period? (2) How are these distributed among the psychological needs? (3) To what extent are PEs which address different psychological needs positively associated with residents’ well-being? (4) To what extent are PDs which address different psychological needs negatively associated with residents’ well-being?	Field observations of 51 residents with dementia in nine residential aged care homes using the dementia care mapping tool.
Wilson, C. B., & Davies, S. (2009). Developing relationships in long term care environments: the contribution of staff. Journal of Clinical Nursing, 18(12), 1746-1755.	2009	UK	Residential aged care	To consider how relationships in care homes influence the experience of older people, their families and staff. The main objectives are: (1) how these relationships are developed (2) the contribution that staff make to this process through the routines of care.	A constructivist design where different perspectives were explored and shared to develop a joint construction of how relationships influenced participants' experiences.The study was conducted in three residential aged care homes. 156 participant observations, eight focus group discussions with with residents, caregivers or family memebers, 16 interviews with residents, 25 with caregivers and 18 w…
